# Supplementary material
Source: MDPI journal article supplement (https://www.mdpi.com/2075-163X/11/4/408)
Supplement: s1 [file s1]

## Sheet: Table S1
WDS and EDS (*) representative date (wt%) of olivines from Terina aillikites
		Sample	SiO2	Al2O3	Cr2O3	FeO	MnO	MgO	CaO	NiO	Total		#Mg		Mn/Fe*100	Ni/Mg*100	Ca/Fe*100
Macrocrysts	G1	Ter-3-2_1-2_Ol_1-2_1	40.823	0.03925	0.0859	9.29685	0.12405	49.0097	0.1139	0.3387	99.8314		90.3805		1.32938	0.900746	1.12605
		Ter-3-2_1-2_Ol_1-5_1	41.0155	0.064	0.0945	9.29034	0.1248	49.2282	0.11425	0.3384	100.27		90.4252		1.33835	0.895953	1.1303
		Ter-3-2_1-2_Ol_1-7_1	40.9116	0.03665	0.08125	9.31069	0.12665	49.1533	0.1139	0.33685	100.071		90.393		1.35522	0.893209	1.12438
		Ter-3-2_1-2_Ol_2-7_1-1	40.9707	0.0395	0.07895	9.30523	0.1267	49.2076	0.11475	0.3389	100.182		90.4077		1.35655	0.897653	1.13343
		Ter-3-2_1-2_Ol_2-7_2-1	40.9346	0.04295	0.0808	9.28199	0.12615	49.151	0.1153	0.3365	100.069		90.4194		1.35404	0.892323	1.14172
		Ter-3-2_1-2_Ol_4-6_1	40.7318	0.0383	0.08005	9.63175	0.12495	48.9896	0.1143	0.34255	100.053		90.0648		1.29246	0.911358	1.09072
		Ter-3-2_1-2_Ol_5-5_1-1	40.6659	0.05505	0.0721	9.24975	0.1237	48.9574	0.1492	0.36605	99.6391		90.4153		1.33237	0.974521	1.48255
		Ter-3-2_1-2_Ol_5-5_2-1	40.858	0.07515	0.07245	9.29757	0.1241	49.1359	0.14695	0.3688	100.079		90.4022		1.32981	0.978276	1.45268
		Ter-3-2_1-2_Ol_5-10_1	41.045	0.04425	0.0784	9.5292	0.12535	49.304	0.1116	0.3394	100.577		90.2167		1.31055	0.897219	1.07641
		Sh-3-22--3-2	41.1459	0.0463	0.0656	9.9115	0.1251	48.8213	0.142653	0.3997	100.658		89.7741		1.25749	1.06707	1.32285
		Sh-3-22--3-3	41.0774	0.0477	0.0618	9.8691	0.1233	48.7059	0.141963	0.4	100.427		89.7917		1.24472	1.0704	1.32211
	G2a	Ter-3-2_1-2_Ol_1-3_1	40.3642	0.03195	0.0344	13.0952	0.14485	46.4683	0.06735	0.27735	100.484		86.3471		1.10203	0.77793	0.472711
		Sh-3-2-5-1	40.4769	0.0245	0.0177	12.9936	0.14017	46.1731	0.0517214	0.2944	100.172		86.3638		1.07476	0.831032	0.365857
		Sh-3-2-5-2	40.3518	0.0243	0.0168	13.2522	0.14594	46.1358	0.0533962	0.2993	100.28		86.1203		1.09717	0.845547	0.370333
		Sh-3-2-5-3	40.3079	0.0286	0.02	13.1192	0.14241	46.0792	0.0561547	0.2963	100.05		86.2259		1.08148	0.838099	0.393413
		Sh-3-2-5-5	40.2027	0.0255	0.0136	13.2247	0.14315	45.911	0.0556621	0.2991	99.8754		86.0867		1.07843	0.84912	0.386851
		Sh-3-2-5-4	40.1606	0.032	0.0328	12.8014	0.13638	46.1218	0.0879756	0.3154	99.6883		86.5253		1.0614	0.891302	0.631648
		Ter-3-2_1-2_Ol_3-4_1	39.9744	0.03105	0.0281	13.1937	0.1467	46.2278	0.0574	0.2732	99.9323		86.1969		1.10777	0.770277	0.399868
		Ter-3-2_1-2_Ol_3-5_1	39.9963	0.04215	0.0403	13.0008	0.1438	46.2365	0.0732	0.27855	99.8116		86.3734		1.10199	0.785213	0.517502
		Ter-3-2_1-2_Ol_3-13_1-1	40.633	0.017	0.04265	11.5459	0.13685	47.7282	0.0523	0.37195	100.528		88.0491		1.18087	1.01573	0.416335
		Ter-3-2_1-2_Ol_3-13_2-1	40.5876	0.0183	0.04535	11.5755	0.1382	47.7572	0.052	0.37	100.544		88.0285		1.18948	1.00979	0.41289
		Ter-3-2_1-2_Ol_5-7_1-1	40.0508	0.03295	0.0373	14.103	0.14455	45.4821	0.08545	0.32045	100.257		85.1805		1.02116	0.918309	0.556892
		Ter-3-2_1-2_Ol_5-7_2-1	39.9243	0.03205	0.0401	14.1055	0.1429	45.3043	0.08675	0.321	99.957		85.1287		1.00932	0.923495	0.565263
		Sh-3-2-1--7-1	40.307	0.0244	0.0292	11.9457	0.13382	46.6361	0.0736907	0.3982	99.5481		87.4341		1.11608	1.11288	0.566984
		Sh-3-2-1--7-2	40.7235	0.0213	0.0329	11.7927	0.13269	47.3592	0.0592087	0.3943	100.516		87.7415		1.12102	1.08515	0.461469
		Sh-3-2-1--5-1	40.2505	0.0321	bdl	14.4239	0.1449	45.2855	0.0613761	0.26	100.458		84.8386		1.00086	0.748313	0.391099
		Sh-3-2-1--5-2	40.1685	0.0324	0.0066	14.5525	0.14587	45.0883	0.0667945	0.2615	100.322		84.6675		0.998654	0.755922	0.421865
		Sh-3-2-1--5-5	40.2866	0.0313	0.0061	14.4022	0.14448	45.3089	0.058125	0.2671	100.505		84.8646		0.999461	0.76835	0.370941
		Sh-3-2-1--5-6	40.5214	0.0301	0.0089	13.9671	0.14185	45.6933	0.0727055	0.2754	100.711		85.3603		1.01184	0.785561	0.478444
		Sh-3-2_Ol-1	40.1698	0.0345404	0.0649852	12.7004	0.13615	45.8024	0.0566952	0.30605	99.2711		86.5367		1.06804	0.870909	0.410297
		Sh-3-2_Ol-2	40.0778	0.045694	0.0825668	12.6006	0.13648	45.6382	0.0727468	0.29996	98.9541		86.5867		1.07911	0.85665	0.530633
		Sh-3-2_Ol-3	40.0753	0.0360695	0.085905	12.445	0.13611	46.2315	0.0815958	0.30587	99.3974		86.8783		1.08964	0.862319	0.602619
		Sh-3-2_Ol-23	40.4593	0.01763	0.0663205	11.1063	0.13201	47.3541	0.047023	0.39817	99.5809		88.3709		1.18419	1.09592	0.389144
		Sh-3-2_Ol-24	40.3426	0.0224872	0.106602	11.5739	0.13424	47.2176	0.0505215	0.37568	99.8236		87.9098		1.15555	1.03701	0.401206
		Sh-3-2_Ol-25	40.4389	0.0142119	0.0645401	11.1088	0.12977	47.0625	0.06966	0.40589	99.2943		88.305		1.16385	1.12409	0.576352
	G2b	Ter-3-2_1-2_Ol_1-4_1	40.2887	0.0438	0.03505	12.6775	0.1347	46.5146	0.1265	0.3843	100.205		86.7362		1.05857	1.07684	0.917122
		Ter-3-2_1-2_Ol_3-6_1	40.106	0.0322	0.03195	13.6987	0.14845	45.8157	0.1259	0.3665	100.325		85.6341		1.07966	1.04263	0.844728
		Ter-3-2_1-2_Ol_4-4_1-1	40.2284	0.1037	0.0393	12.5826	0.1335	46.5164	0.13405	0.3872	100.125		86.8229		1.05706	1.08492	0.979191
		Ter-3-2_1-2_Ol_4-4_2-1	40.1103	0.05895	0.0362	12.5444	0.1322	46.4546	0.1345	0.38535	99.8564		86.8425		1.04995	1.08118	0.985472
		Ter-3-2_1-2_Ol_4-7_1	40.0733	0.05475	0.0422	12.815	0.13745	46.4064	0.11735	0.352	99.9984		86.5846		1.0686	0.98863	0.841659
		Ter-3-2_1-2_Ol_4-10_1	40.4652	0.0561	0.0338	11.8737	0.1286	47.2931	0.13705	0.3658	100.353		87.6525		1.07905	1.00813	1.06087
		Ter-3-2_1-2_Ol_4-12_1	40.6358	0.0526	0.03615	11.8601	0.12845	47.5227	0.13805	0.3648	100.739		87.7173		1.07903	1.00051	1.06984
		Ter-3-2_1-2_Ol_5-1_1-1	39.741	0.04465	0.0368	12.9417	0.13845	45.7383	0.1306	0.3866	99.1582		86.2993		1.06583	1.10167	0.927516
		Ter-3-2_1-2_Ol_5-1_2-1	39.7819	0.04195	0.0354	12.7293	0.13535	45.7282	0.133	0.3814	98.9665		86.4912		1.05935	1.08709	0.96032
		Ter-3-2_1-2_Ol_5-3_1	40.1784	0.05585	0.0347	11.919	0.1285	46.9701	0.13575	0.36675	99.7891		87.5367		1.07411	1.01769	1.04681
		Ter-3-2_1-2_Ol_5-8_1-1	40.2687	0.047	0.0472	12.1869	0.13705	46.7762	0.12705	0.35265	99.9427		87.2462		1.1204	0.982626	0.958191
		Ter-3-2_1-2_Ol_5-8_2-1	40.1953	0.0497	0.0466	12.1459	0.13675	46.7632	0.12795	0.3527	99.818		87.2806		1.12172	0.983039	0.968238
		Ter-3-2_1-2_Ol_5-9_1	40.3897	0.05235	0.03495	11.8836	0.1279	47.1926	0.13635	0.36795	100.185		87.6205		1.07229	1.01621	1.05458
		Sh-3-2_Ol-4	40.1484	0.0504613	0.0574184	11.5406	0.12474	46.6847	0.134175	0.40038	99.1409		87.8194		1.07687	1.11781	1.0686
		Sh-3-2_Ol-5	40.423	0.0484825	0.0656528	11.5724	0.12377	46.3061	0.137262	0.39819	99.0749		87.7024		1.06556	1.12078	1.09017
		Sh-3-2_Ol-6	40.467	0.0462337	0.0629822	11.565	0.1227	46.9893	0.133969	0.3987	99.7858		87.8664		1.05703	1.1059	1.06471
		Sh-3-2_Ol-11	40.2566	0.0402072	0.0667656	11.6557	0.12475	46.4682	0.137159	0.39165	99.1411		87.6627		1.06632	1.09853	1.08158
		Sh-3-2_Ol-12	40.2153	0.0654828	0.0638724	11.4978	0.12248	46.9888	0.137879	0.39676	99.4883		87.9282		1.0613	1.10053	1.10219
		Sh-3-2_Ol-13	40.2198	0.0408368	0.0563056	11.6376	0.12721	46.6858	0.168542	0.39977	99.3359		87.7298		1.08904	1.11608	1.33111
		Sh-3-2_Ol-14	40.3553	0.0434453	0.0672107	11.4601	0.12384	47.0936	0.134484	0.39428	99.6723		87.9865		1.07661	1.09122	1.07857
		Sh-3-2_Ol-47	40.2986	0.0543291	0.063995	11.4511	0.12415	47.0516	0.130311	0.38845	99.5626		87.9855		1.08015	1.07604	1.04593
		Sh-3-2_Ol-48	40.3956	0.0470433	0.0732663	11.4771	0.12378	46.8591	0.133999	0.40066	99.5106		87.918		1.07449	1.11443	1.07309
		Sh-3-2_Ol-49	40.2091	0.0515407	0.0789196	12.0687	0.13221	46.6677	0.129798	0.40387	99.7418		87.3286		1.09142	1.12796	0.988506
		Sh-3-2_Ol-50	40.1615	0.0423659	0.0714573	12.4456	0.13934	46.4044	0.132257	0.39438	99.7913		86.9202		1.11544	1.10771	0.976728
		Ter-3-2_1-2_Ol_2-2_1	39.7961	0.03245	0.0417	13.2671	0.1558	45.5826	0.1634	0.34115	99.3802		85.962		1.16998	0.975473	1.132
		Ter-3-2_1-2_Ol_3-1_1	39.822	0.03145	0.04055	13.281	0.15505	45.7465	0.1639	0.3409	99.5813		85.9926		1.16313	0.971267	1.13428
		Ter-3-2_1-2_Ol_3-9_1	40.0717	0.0342	0.04115	13.3173	0.15495	45.9707	0.16265	0.34195	100.095		86.0186		1.15921	0.969505	1.12255
		Ter-3-2_1-2_Ol_4-3_1	39.9672	0.0333	0.0448	13.3127	0.15325	45.9147	0.1675	0.34245	99.9359		86.0081		1.14689	0.972107	1.15643
		Ter-3-2_1-2_Ol_4-9_1	40.3332	0.0336	0.03935	13.3493	0.1559	46.2814	0.16135	0.3437	100.698		86.0706		1.16352	0.967927	1.11091
		Sh-3-2-4-1	40.3277	0.0345	0.0353	13.3288	0.1583	45.9559	0.155066	0.3696	100.365		86.0044		1.18325	1.04824	1.06929
		Sh-3-2-4-2	40.3403	0.0328	0.0381	13.4474	0.1592	45.9973	0.1594	0.3738	100.548		85.9083		1.17948	1.05919	1.08949
		Sh-3-2-4-3	39.9911	0.0305	0.036	13.448	0.1625	45.6092	0.155952	0.3649	99.7981		85.8048		1.20388	1.04278	1.06587
		Sh-3-2-4-4	40.0759	0.0315	0.0355	13.4186	0.1633	45.576	0.154376	0.3649	99.8201		85.8226		1.21246	1.04353	1.05741
		Sh-3-2-4-5	40.1832	0.0331	0.0354	13.3634	0.1573	45.7064	0.158218	0.3705	100.008		85.9073		1.17273	1.05653	1.0882
		Sh-3-2_Ol-10	40.2995	0.0326514	0.0818991	12.0669	0.13112	46.19	0.146214	0.39454	99.3428		87.216		1.08258	1.1133	1.11368
		Sh-3-2_Ol-34	39.9044	0.0293233	0.0714573	13.2001	0.15206	45.2844	0.148034	0.38452	99.1742		85.9439		1.14769	1.10672	1.03075
		Sh-3-2_Ol-35	39.6742	0.0295932	0.0633166	13.6953	0.15989	45.3029	0.158483	0.34453	99.4281		85.4981		1.16315	0.991221	1.06361
		Sh-3-2_Ol-36	39.917	0.0277043	0.0868342	13.1275	0.15442	45.9318	0.156742	0.36334	99.7652		86.1803		1.17195	1.03103	1.09742
		Sh-3-2_Ol-37	40.0097	0.0262651	0.0750754	13.1699	0.15645	45.945	0.165347	0.35545	99.9031		86.1453		1.18353	1.00835	1.15394
		Sh-3-2_Ol-38	40.0672	0.0291434	0.0723618	12.9349	0.14948	46.1177	0.161044	0.37056	99.9023		86.4029		1.15135	1.04727	1.14434
		Sh-3-2_Ol-39	40.0534	0.0297731	0.084799	12.9862	0.15111	46.1608	0.162069	0.36847	99.9966		86.3673		1.15931	1.04039	1.14706
		Sh-3-2_Ol-15	40.0543	0.0286937	0.0758902	13.0667	0.15427	45.7221	0.153005	0.36439	99.6194		86.181		1.17625	1.03875	1.07624
		Sh-3-2_Ol-16	40.0305	0.0295032	0.0692136	13.1092	0.154	45.9518	0.165044	0.3594	99.8687		86.202		1.17039	1.0194	1.15715
		Sh-3-2_Ol-17	39.9884	0.0315721	0.077003	12.885	0.15303	46.1262	0.153417	0.36151	99.7761		86.4504		1.18326	1.02151	1.09436
	G3	Ter-3-2_1-2_Ol_1-1_1	39.433	0.0234	0.01345	16.8215	0.18235	43.2486	0.06965	0.16275	99.9547		82.0863		1.08001	0.490476	0.380564
		Ter-3-2_1-2_Ol_1-9_1	40.0839	0.02905	0.0247	15.5327	0.1714	44.7615	0.1029	0.2297	100.936		83.703		1.09939	0.668845	0.60889
		Ter-3-2_1-2_Ol_1-10_1	40.0144	0.0353	0.0117	15.871	0.1523	44.45	0.0942	0.276	100.905		83.3102		0.956056	0.809294	0.545529
		Ter-3-2_1-2_Ol_1-11_1	40.0773	0.0499	0.0104	15.8719	0.163	44.3356	0.073	0.3051	100.886		83.2735		1.02317	0.896931	0.422731
		Ter-3-2_1-2_Ol_2-1_1	39.2975	0.02325	bdl	16.9747	0.1655	42.7601	0.06025	0.2925	99.5738		81.7839		0.971364	0.891572	0.32623
		Ter-3-2_1-2_Ol_2-5_1	39.3281	0.02	0.0083	17.1903	0.1895	42.8815	0.056	0.1561	99.8298		81.6377		1.09828	0.474463	0.299415
		Ter-3-2_1-2_Ol_2-9_1	39.6926	0.041	0.0249	15.7241	0.1535	44.0315	0.1093	0.2943	100.071		83.3079		0.972589	0.871156	0.638887
		Ter-3-2_1-2_Ol_2-10_1	39.6736	0.01445	bdl	17.7133	0.1922	42.8529	0.0585	0.26285	100.768		81.174		1.08104	0.799461	0.303547
		Ter-3-2_1-2_Ol_2-11_1	39.9569	0.0206	0.01165	16.8267	0.1854	43.7644	0.0563	0.1762	100.998		82.2555		1.09774	0.524752	0.307525
		Ter-3-2_1-2_Ol_3-2_1	39.3455	0.0169	0.01645	16.3894	0.1843	43.4958	0.05105	0.20255	99.7019		82.548		1.12034	0.606952	0.286288
		Ter-3-2_1-2_Ol_3-3_1	39.718	0.02185	0.0171	15.5582	0.1718	44.4143	0.0811	0.1939	100.176		83.5741		1.10015	0.569015	0.479106
		Ter-3-2_1-2_Ol_3-7_1	39.5623	0.03355	0.00815	15.6374	0.15695	44.2031	0.08975	0.23115	99.9224		83.4384		0.99996	0.681569	0.52752
		Ter-3-2_1-2_Ol_3-11_1	39.3478	0.0109	bdl	17.4908	0.18575	42.7287	0.05885	0.26285	100.086		81.3224		1.05805	0.801784	0.309249
		Ter-3-2_1-2_Ol_3-12_1	39.685	0.01605	0.00605	17.6032	0.19235	43.2796	0.052	0.15195	100.986		81.4194		1.08865	0.4576	0.271507
		Ter-3-2_1-2_Ol_4-1_1	39.1313	0.0335	0.00815	15.5665	0.1552	43.6884	0.09185	0.231	98.9059		83.3392		0.993319	0.689152	0.542325
		Ter-3-2_1-2_Ol_4-2_1	39.2233	0.01605	0.0067	17.1791	0.18635	42.8351	0.05785	0.26895	99.7734		81.6312		1.08073	0.818353	0.309509
		Ter-3-2_1-2_Ol_4-11_1-1	39.6855	0.0192	0.0053	17.4591	0.19125	43.353	0.0518	0.15345	100.919		81.569		1.09136	0.461336	0.272696
		Ter-3-2_1-2_Ol_4-11_2-1	39.6332	0.01735	0.0082	17.4366	0.19125	43.2008	0.05065	0.15585	100.694		81.5354		1.09276	0.470202	0.266985
		Ter-3-2_1-2_Ol_5-2_1	39.3012	0.0125	0.00845	16.0294	0.17105	43.6464	0.0543	0.24025	99.4636		82.9146		1.06314	0.717438	0.311352
		Ter-3-2_1-2_Ol_5-4_1	39.6328	0.031	0.0071	15.6448	0.15635	44.1127	0.08985	0.2315	99.9061		83.4036		0.99567	0.684001	0.52786
		Ter-3-2_1-2_Ol_5-6_1-1	39.7595	0.0339	0.0079	15.6682	0.1553	44.4807	0.0891	0.233	100.428		83.4977		0.987504	0.682738	0.522671
		Ter-3-2_1-2_Ol_5-6_2-1	39.6499	0.0467	0.00955	15.621	0.15735	44.2438	0.0897	0.23055	100.049		83.4656		1.00356	0.679176	0.52778
		Ter-3-2_1-2_Ol_5-11_1	40.0259	0.01565	0.01095	16.0254	0.1702	44.4834	0.05685	0.24025	101.029		83.1856		1.05813	0.703938	0.326055
		Ter-3-2_1-2_Ol_7-4_1-1	38.9845	0.0294	0.00715	16.5589	0.1645	42.8666	0.0807	0.24805	98.9398		82.187		0.989743	0.754205	0.447933
		Ter-3-2_1-2_Ol_7-4_2-1	39.3581	0.02965	0.00875	16.5496	0.1625	43.3305	0.0823	0.2488	99.7702		82.3521		0.978256	0.748386	0.457069
		Ter-3-2_1-2_Ol_7-9_1-1	39.5254	bdl	bdl	16.1789	0.4013	43.8739	0.04085	bdl	100.02		82.8567		2.47119	0.0286675	0.232067
		Ter-3-2_1-2_Ol_7-9_2-1	39.4386	bdl	bdl	16.1733	0.4002	43.8313	0.0405	bdl	99.8839		82.8479		2.46528	0.0275059	0.230159
		Ter-3-2_1-2_Ol_7-11_1-1	39.5515	0.01725	0.01105	15.3427	0.1577	44.3308	0.0604	0.307	99.7785		83.739		1.02404	0.902613	0.36183
		Ter-3-2_1-2_Ol_7-11_2-1	39.6076	0.01865	0.0138	15.3078	0.1585	44.4685	0.06045	0.30685	99.9421		83.8122		1.03158	0.899379	0.362957
		Sh-3-2-3--3-1	39.7651	0.0188	0.0128	16.2198	0.1875	43.5571	0.0516229	0.22361	100.036		82.7175		1.15171	0.669116	0.292528
		Sh-3-2-3--3-2	39.9484	0.02	0.0141	15.9216	0.1832	43.8776	0.0536917	0.23814	100.257		83.0844		1.14637	0.70739	0.309949
		Sh-3-2-3--3-3	40.1006	0.0242	0.0165	15.6446	0.1787	44.1951	0.0548739	0.22677	100.441		83.4296		1.13801	0.668776	0.322383
		Sh-3-2-3--3-4	39.9667	0.023	0.0134	16.089	0.1867	43.9276	0.0488644	0.229	100.484		82.9531		1.15612	0.679464	0.279147
		Sh-3-2-3--3-5	39.8082	0.0209	0.01	16.2043	0.1838	43.6477	0.0502436	0.21993	100.145		82.7608		1.13006	0.656739	0.284984
		Sh-3-2-2--2-6	39.7594	0.0182	0	17.4936	0.1926	42.7558	0.0486674	0.172	100.44		81.3295		1.09689	0.524328	0.255699
		Sh-3-2-2--2-7	39.7656	0.0202	0	17.3456	0.1917	42.8604	0.0490614	0.1719	100.404		81.4951		1.10108	0.522744	0.259969
		Sh-3-2-2--2-10	39.8999	0.0199	0	17.2546	0.189	43.0637	0.052411	0.1728	100.652		81.6453		1.0913	0.523	0.279182
		Sh-3-2-4--3-6	39.6079	0.0241	0	17.0199	0.1769	42.8836	0.0544799	0.24021	100.007		81.7873		1.03552	0.730078	0.294204
		Sh-3-2-4--3-7	39.6323	0.0235	0	16.667	0.1711	43.0898	0.0617701	0.24444	99.8899		82.1677		1.02277	0.739379	0.340637
		Sh-3-2-1--3-3	40.154	0.0369	0.0109	15.8056	0.14949	44.2388	0.0878771	0.3055	100.789		83.3013		0.942297	0.900072	0.511017
		Sh-3-2-1--3-4	40.2223	0.0545	0.0178	15.6203	0.14826	44.3763	0.090143	0.3049	100.835		83.5075		0.94563	0.89552	0.530411
		Sh-3-2-4--3-9	39.6072	0.0262	0	16.6853	0.1725	43.097	0.0562532	0.2497	99.8942		82.1541		1.03001	0.755163	0.309873
		Sh-3-2_Ol-18	39.2228	0.0184395	0	17.0238	0.18366	42.5355	0.0483607	0.16412	99.1968		81.6621		1.07484	0.502897	0.261099
		Sh-3-2_Ol-19	39.5956	0.019429	0.0178042	15.5585	0.16919	44.2407	0.0777887	0.20923	99.8883		83.5199		1.08341	0.616412	0.459534
		Sh-3-2_Ol-20	38.9592	0.0116034	0	17.0371	0.18072	42.1299	0.0499041	0.16744	98.5359		81.5064		1.05681	0.518009	0.269221
		Sh-3-2_Ol-26	39.6032	0.0340906	0.00701005	15.1047	0.15042	44.3911	0.0906642	0.25624	99.6374		83.9691		0.992158	0.752351	0.551689
		Sh-3-2_Ol-27	39.6019	0.0301329	0.00859296	15.2129	0.15045	44.2005	0.091074	0.25625	99.5517		83.8145		0.985298	0.755624	0.550241
		Sh-3-2_Ol-28	39.5165	0.0340906	0	15.1871	0.15218	44.1598	0.0851322	0.24336	99.3781		83.825		0.998321	0.718275	0.515217
		Sh-3-2_Ol-29	39.3092	0.0296831	0.00701005	15.2241	0.14961	44.2315	0.0867713	0.23187	99.2698		83.814		0.979072	0.683253	0.523858
		Sh-3-2_Ol-30	39.38	0.0336409	0.00565327	15.1761	0.14994	44.251	0.0917911	0.25238	99.3406		83.8628		0.984337	0.743363	0.555918
		Sh-3-2_Ol-31	39.5642	0.029953	0	15.2324	0.15137	44.1287	0.0872835	0.25499	99.4489		83.775		0.990053	0.753132	0.526665
		Sh-3-2_Ol-32	39.5481	0.0411066	0	15.1972	0.1525	43.9665	0.0867713	0.2538	99.2459		83.7564		0.999756	0.752383	0.524788
		Sh-3-2_Ol-33	39.48	0.0270746	0	15.2275	0.15293	43.7814	0.0891276	0.25271	99.0108		83.6717		1.00058	0.752318	0.537963
		Ter1_2-4	39.3611	0.0255756	0	16.6921	0.165683	43.578	0.0722	0.190625	100.085		82.3103		0.988901	0.57014	0.397554
		Ter1_2-5	39.3929	0.0242736	0	17.0485	0.170832	43.5323	0.0675	0.182083	100.418		81.9851		0.998322	0.545165	0.363905
		Ter1_2-6	39.2586	0.0228786	0	17.2009	0.170733	43.2752	0.0668	0.184194	100.179		81.7651		0.988904	0.554759	0.35694
		Ter1_2-7	39.2107	0.0204605	0	17.3359	0.17004	43.1497	0.0673	0.179873	100.134		81.6047		0.977219	0.543321	0.356811
		Ter1_2-8	39.2548	0.0217625	0	17.0635	0.167069	43.4422	0.0671	0.18349	100.2		81.9415		0.975472	0.550516	0.36143
		Ter1_2-9	39.1797	0.0217625	0	17.231	0.166772	43.1898	0.0663	0.180174	100.036		81.7095		0.964272	0.543726	0.35365
		Ter1_2-10	39.3176	0.0229716	0	17.3174	0.170931	43.3073	0.0673	0.180375	100.384		81.6754		0.98339	0.542856	0.357193
		Ter1_2-11	39.4217	0.0220415	0	17.3382	0.169644	43.324	0.065	0.182887	100.523		81.6632		0.974813	0.550205	0.344572
		Ter1_2-12	39.2411	0.0177634	0	17.3253	0.16796	43.1309	0.066	0.178968	100.128		81.6073		0.965857	0.540825	0.350133
		Ter1_2-13	39.4499	0.0233436	0	16.8733	0.166475	43.7261	0.0713	0.188515	100.499		82.2022		0.982959	0.561919	0.388382
	G4	Ter-3-2_1-2_Ol_1-8_1	39.1928	bdl	0	20.7163	0.4248	40.5926	0.0507	bdl	100.977		77.7397		2.04295	0.0139673	0.224939
		Ter-3-2_1-2_Ol_4-8_1-1	38.785	bdl	0	20.6439	0.42535	40.3411	0.0515	bdl	100.247		77.6927		2.05278	0.0198699	0.229291
		Ter-3-2_1-2_Ol_4-8_2-1	38.7537	bdl	0	20.678	0.4277	40.2635	0.05235	bdl	100.175		77.6306		2.06071	0.0186134	0.23269
		Ter-3-2_1-2_Ol_7-1_2-2	38.4602	0.0172	0.0061	19.3971	0.2059	40.5614	0.0718	0.1589	98.8786		78.8447		1.05756	0.510599	0.340219
		Ter-3-2_1-2_Ol_7-2_1-1	38.3461	0.00915	0	19.1598	0.20795	40.6403	0.06585	0.1768	98.606		79.0814		1.08132	0.567015	0.315889
		Ter-3-2_1-2_Ol_7-3_1	38.4785	0.00935	0	19.4151	0.20695	40.6333	0.0683	0.15615	98.9676		78.8588		1.06197	0.500875	0.323335
		Ter-3-2_1-2_Ol_7-6_1	38.8197	0.0086	0.0052	19.0915	0.20635	41.3423	0.066	0.1786	99.7184		79.4218		1.07684	0.563061	0.317741
		Ter-3-2_1-2_Ol_7-8_1-1	38.7177	0.00745	0	19.5271	0.2076	40.9387	0.069	0.1731	99.6407		78.8877		1.0592	0.551102	0.324775
		Ter-3-2_1-2_Ol_7-8_2-1	38.6493	0.0085	0	19.506	0.2083	40.8327	0.06995	0.17095	99.4457		78.8626		1.06392	0.54567	0.329603
		Ter1_2-56	38.1238	bdl	0	23.2032	0.2758	38.237	0.0358	0.172654	100.048		74.6003		1.18422	0.588521	0.141809
		Ter1_2-57	38.1679	bdl	0	23.1807	0.2781	38.3953	0.0353	0.174766	100.232		74.6969		1.19526	0.593263	0.139965
		Ter1_2-58	38.3528	bdl	0	23.1814	0.2775	38.5121	0.0363	0.170945	100.531		74.7537		1.19264	0.578532	0.143925
		Ter1_2-59	38.1852	bdl	0	23.2343	0.278	38.4041	0.0366	0.176173	100.314		74.6575		1.19207	0.597905	0.144784
		Ter1_2-60	38.0653	bdl	0	23.1835	0.2733	38.2837	0.0367	0.17376	100.016		74.6395		1.17448	0.591569	0.145498
		Ter1_2-61	38.2691	bdl	0	23.1792	0.276	38.577	0.0374	0.175771	100.514		74.7872		1.18631	0.593866	0.148301
		Ter1_2-62	38.1848	bdl	0	23.2256	0.2774	38.4016	0.0371	0.174665	100.301		74.6634		1.18994	0.592824	0.146817
		Ter1_2-63	38.1718	bdl	0	23.1254	0.2767	38.3231	0.0414	0.17376	100.112		74.7065		1.19208	0.590961	0.164544
		Ter1_2-64	38.2129	bdl	0	23.2241	0.2757	38.369	0.0381	0.172956	100.293		74.6486		1.18273	0.587521	0.150784
	rim	Ter1_2-1	39.833	0.0255756	0.04205	14.5907	0.167762	45.2811	0.1955	0.281064	100.417		84.6888		1.14553	0.809015	1.23152
		Ter1_2-2	39.875	0.0285517	0.03926	14.3581	0.145876	45.4745	0.1341	0.337136	100.393		84.9506		1.01222	0.966286	0.858424
		Ter1_2-3	39.8673	0.0335738	0.03567	14.0439	0.140033	45.6371	0.1296	0.366679	100.254		85.2762		0.993412	1.04722	0.848179
		Ter1_2-15	39.6595	0.0335738	0.03089	14.4251	0.144985	45.2718	0.1244	0.334624	100.025		84.8336		1.00136	0.96338	0.792632
		Ter1_2-16	39.8776	0.0353409	0.0358	13.8231	0.138944	45.7984	0.1333	0.366378	100.209		85.5178		1.00143	1.04267	0.886329
		Ter1_2-17	39.834	0.0352479	0.03611	13.8806	0.140033	45.7984	0.1362	0.363162	100.224		85.4663		1.0051	1.03352	0.90186
		Ter1_2-18	39.8324	0.0385959	0.03662	14.2871	0.141717	45.6251	0.1335	0.375622	100.471		85.056		0.988242	1.07304	0.85883
		Ter1_2-19	39.9797	0.0299467	0.03853	13.9162	0.141915	45.9714	0.1351	0.363463	100.576		85.4813		1.016	1.03049	0.892288
		Ter1_2-20	39.8074	0.0292027	0.03894	14.0581	0.143499	45.7497	0.1457	0.359826	100.332		85.2944		1.01697	1.02512	0.952583
		Sh-3-2-4--3-1	39.94	0.0464	0.0261	13.4257	0.1438	45.3602	0.122851	0.40046	99.4655		85.7583		1.06711	1.15068	0.841028
		Sh-3-2-4--3-2	39.9754	0.0461	0.0309	13.5393	0.1437	45.3825	0.119994	0.40179	99.6397		85.6611		1.05742	1.15393	0.814577
		Sh-3-2-4--3-3	40.0562	0.0441	0.0311	13.5155	0.1449	45.4318	0.1196	0.40212	99.7453		85.696		1.06813	1.15363	0.813332
		Sh-3-2-2--2-1	40.213	0.0313	0.0313	13.5147	0.1575	45.5222	0.173193	0.3708	100.014		85.7211		1.16108	1.06166	1.17786
		Sh-3-2-2--2-2	40.295	0.0333	0.0314	13.5123	0.1539	45.663	0.171124	0.369	100.229		85.7611		1.13474	1.05325	1.164
		Sh-3-2-1--3-1	40.5084	0.0514	0.0491	12.8666	0.13435	46.4732	0.141963	0.3785	100.604		86.5546		1.04031	1.06153	1.0141
		Sh-3-2-1--3-2	40.4095	0.048	0.0454	13.5019	0.13942	45.9519	0.126299	0.3354	100.558		85.8473		1.02877	0.951324	0.859754
		Sh-3-2-1--5-3	40.4848	0.0344	0.0341	12.7608	0.13394	46.3232	0.164523	0.4161	100.352		86.6129		1.04573	1.17076	1.185
		Sh-3-2-4--3-8	40.0503	0.0355	0.0226	14.3857	0.1549	44.9341	0.104132	0.33327	100.02		84.7724		1.07277	0.966695	0.665312
Groundmass olivines	core	Ter1_2-21	39.8757	0.0519883	0.05059	13.7933	0.135545	45.8829	0.1338	0.364569	100.288		85.5673		0.979041	1.03561	0.891575
		Ter1_2-22	39.7763	0.0430601	0.0502	13.7396	0.13901	45.65	0.1331	0.362559	99.8938		85.5526		1.008	1.03516	0.890377
		Ter1_2-23	39.6817	0.0312488	0.03951	14.7645	0.142772	44.9634	0.1329	0.349496	100.106		84.4424		0.963412	1.0131	0.827325
		Ter1_2-26	39.7512	0.0289237	0.03924	13.775	0.140198	45.7851	0.1392	0.370498	100.029		85.5573		1.014	1.0547	0.92879
		Ter1_2-28	39.8828	0.0343178	0.03576	13.7097	0.139208	46.0208	0.142	0.349998	100.315		85.6791		1.01163	0.991244	0.951986
		Ter1_2-29	40.1633	0.0331088	0.03777	13.6502	0.139307	46.1965	0.1437	0.371703	100.736		85.7789		1.01676	1.04871	0.967582
		Ter1_2-31	39.5607	0.0331088	0.04149	15.1397	0.153564	44.5578	0.1264	0.34005	99.9528		83.9884		1.01056	0.99469	0.767361
		Ter1_2-34	39.9706	0.0327368	0.03582	13.5312	0.135149	46.2001	0.1364	0.37502	100.417		85.8863		0.995089	1.05799	0.926506
		Ter1_2-35	39.6731	0.0283657	0.01343	14.8892	0.149208	45.0829	0.1049	0.290309	100.231		84.3666		0.998406	0.8393	0.647551
		Ter1_2-38	39.9483	0.0338528	0.03816	13.6227	0.137228	46.1171	0.1399	0.374417	100.412		85.7825		1.00361	1.05819	0.943897
		Ter1_2-50	39.8442	0.0295747	0.04122	13.8897	0.1488	45.8095	0.152	0.355162	100.27		85.4612		1.06733	1.01051	1.00582
		Ter1_2-40	40.1302	0.042037	0.03258	12.9587	0.132376	46.7635	0.1384	0.390093	100.588		86.544		1.01774	1.08725	0.981623
		Ter1_2-41	39.9407	0.0371079	0.03669	13.3329	0.135446	46.3254	0.1377	0.382757	100.329		86.0968		1.01211	1.07689	0.949247
		Ter1_2-46	39.7158	0.0325508	0.03968	14.2367	0.1455	45.6003	0.1325	0.359889	100.263		85.0939		1.01822	1.02865	0.855415
		Ter1_2-48	39.7113	0.0328298	0.037	14.5074	0.1497	45.2918	0.1325	0.354157	100.217		84.766		1.02806	1.01917	0.839453
		Ter1_2-51	39.9926	0.0279937	0.03873	13.8066	0.1443	45.973	0.1435	0.371855	100.499		85.5796		1.04128	1.05424	0.95529
	rim(EDS)	Ter1_3_2--1-5	39.77	bdl	bdl	13.58	0.26	45.82	0.2	0.36	99.99		85.7419
		Ter1_3_3-7	39.76	bdl	bdl	14.41	0.16	45.08	0.21	0.38	100		84.7924
		Ter1_3_4-1	39.42	0.35	bdl	15.04	0.24	44.3	0.36	0.3	100.01		83.9992
		Ter1_3_6-2	39.63	bdl	bdl	15.02	0.16	44.71	0.22	0.26	100		84.1404
		Ter1_3_6-6	39.8	bdl	bdl	14.56	0.2	44.8	0.28	0.37	100.01		84.5773
		Ter1_3_11-4	39.42	bdl	bdl	15	0.2	44.92	0.25	0.21	100		84.2205
		Ter1_3_11-5	39.4	bdl	bdl	15.18	0.21	44.6	0.39	0.22	100		83.9653
		Ter1_3_4	39.52	bdl	bdl	15.12	0.26	44.68	0.24	0.18	100		84.0426
		Ter1_3_5	39.61	bdl	bdl	14.71	0.17	45.03	0.18	0.3	100		84.5103
		Ter1_3_3-5	39.78	bdl	bdl	13.99	0.16	45.51	0.18	0.38	100		85.2894
		Ter1_3_3-6	39.66	bdl	bdl	14.24	0.21	45.36	0.22	0.32	100.01		85.0238
		Ter1_3_2--1-2	39.8	bdl	bdl	13.76	0.17	45.79	0.13	0.35	100		85.5721
		Ter1_3_2--1-6	39.69	bdl	bdl	14.1	0.17	45.49	0.21	0.33	99.99		85.1854
		Ter1_3_3-4	39.55	bdl	bdl	14.66	0.19	45.1	0.27	0.23	100		84.5751
		Ter1_3_3-5	39.49	bdl	bdl	14.42	0.24	45.37	0.2	0.29	100.01		84.866
		Ter1_3_3-6	39.54	0.18	bdl	15.25	0.21	44.54	0.27	bdl	99.99		83.8851
		Ter1_3_11-6	39.36	bdl	bdl	15.22	0.31	44.61	0.29	0.2	99.99		83.9329
		Ter1_3_11-7	39.62	bdl	bdl	15.08	0.2	44.6	0.24	0.26	100		84.0541
		Ter1_3_4-4	39.57	bdl	bdl	15.28	0.16	44.38	0.38	0.22	99.99		83.8098
		Ter1_3_4-5	39.55	bdl	bdl	14.97	0.13	44.81	0.33	0.22	100.01		84.2146
		Ter1_3_5	39.66	bdl	bdl	14.09	0.21	45.46	0.21	0.37	100		85.186
	rim(WDS)	Ter1_2-24	39.7805	0.0334808	0.03742	14.982	0.144752	44.9115	0.1303	0.325379	100.345		84.234		0.962594	0.94428	0.799364
		Ter1_2-25	39.953	0.0268777	0.03963	13.8727	0.147228	45.846	0.1611	0.355324	100.402		85.4863		1.05734	1.01016	1.06734
		Ter1_2-27	39.7222	0.0257616	0.02465	14.7616	0.179505	45.031	0.2648	0.229413	100.239		84.4647			0.664012	1.64875
		Ter1_2-30	39.5461	0.0218555	0.02118	15.0081	0.197921	44.5059	0.2933	0.201478	99.7958		84.0898		1.31387	0.590035	1.79621
		Ter1_2-32	39.7472	0.0281797	0.041	14.423	0.15604	45.2074	0.1705	0.330604	100.104		84.8172		1.07787	0.953164	1.08652
		Ter1_2-33	39.8298	0.0284587	0.04221	14.2078	0.157327	45.4699	0.1794	0.317641	100.233		85.0834		1.10322	0.910504	1.16056
		Ter1_2-36	39.7561	0.0210185	0.06744	14.3852	0.167921	45.4529	0.1621	0.201478	100.214		84.9204		1.16299	0.577742	1.03571
		Ter1_2-37	39.8524	0.0276217	0.05085	13.9957	0.152772	45.7802	0.1707	0.335427	100.366		85.3585		1.08752	0.95497	1.12101
		Ter1_2-39	39.9056	0.0293887	0.04287	14.0016	0.149802	45.8499	0.1573	0.352309	100.489		85.3722		1.06593	1.00151	1.03257
		Ter1_2-42	39.5787	0.0265057	0.0349	14.5424	0.167723	45.1508	0.2004	0.280059	99.9815		84.6945		1.14906	0.808449	1.26658
		Ter1_2-43	39.7898	0.0278077	0.04185	13.9282	0.1533	45.6989	0.1679	0.340582	100.148		85.3966		1.09656	0.971371	1.10796
		Ter1_2-44	39.727	0.0271567	0.04006	13.9755	0.1534	45.6159	0.1772	0.335353	100.052		85.3316		1.09357	0.958198	1.16538
		Ter1_2-45	39.9279	0.0304117	0.04647	14.2888	0.1473	45.6514	0.1417	0.354961	100.589		85.0618		1.02706	1.01344	0.911474
		Ter1_2-49	39.6602	0.0239946	0.02041	14.9374	0.1927	44.9637	0.2725	0.214485	100.285		84.2889		1.28527	0.621734	1.67672
		Ter1_2-52	39.8622	0.0275287	0.04054	13.8666	0.1524	45.7427	0.167	0.348626	100.208		85.4637		1.09497	0.993362	1.10692
		Ter1_2-53	39.8939	0.0223205	0.05075	14.1444	0.1646	45.516	0.1796	0.264059	100.236		85.1529		1.1594	0.756147	1.16706
		Ter1_2-54	39.7782	0.0247386	0.05526	14.4655	0.1631	45.2282	0.2061	0.30046	100.222		84.7852		1.12333	0.865858	1.30953
		Ter1_2-55	39.6051	0.0368289	0.07687	14.4835	0.1643	45.0731	0.201	0.302069	99.9428		84.7247		1.13019	0.87349	1.27554

## Sheet: Table S2
	ICP-LA representative date (ppm) of olivines from Terina aillikites
		Sample	#Mg		Li7	Na23	Al27	31P	Ca42	Sc45	Ti47	V51	Cr52	Mn55	Co59	Ni60	Cu65	Zn66	93Nb		Be9	B11	Ga71	Ge74	As75	Se82	Rb85	Sr88	Y89	Zr90	Nb93	Mo95	Ag109	Cd114	In115	Sn120	Sb123	Te128	Cs133	Ba137	La139	Ce140	Pr141	Nd146	Sm147	Eu153	Gd158	Tb159	Dy163
Macrocrysts	G1	Ter-3-2_1-2_Ol_1-2_1	90.3805		1.61854	98.6486	159.184	44.6899	1081.85	5.86598	78.7344	10.1084	274.031	n.a.	129.147	2673.48	5.50541	57.9395	bdl		n.a.	n.a.	n.a.	n.a.	n.a.	n.a.	n.a.	n.a.	n.a.	n.a.	n.a.	n.a.	n.a.	n.a.	n.a.	n.a.	n.a.	n.a.	n.a.	n.a.	n.a.	n.a.	n.a.	n.a.	n.a.	n.a.	n.a.	n.a.	n.a.
		Ter-3-2_1-2_Ol_1-5_1	90.4252		1.73795	104.889	161.149	41.5377	1006.21	5.70633	82.9866	10.5029	302.111	n.a.	134.182	2664.83	5.54332	60.8289	bdl		n.a.	n.a.	n.a.	n.a.	n.a.	n.a.	n.a.	n.a.	n.a.	n.a.	n.a.	n.a.	n.a.	n.a.	n.a.	n.a.	n.a.	n.a.	n.a.	n.a.	n.a.	n.a.	n.a.	n.a.	n.a.	n.a.	n.a.	n.a.	n.a.
		Ter-3-2_1-2_Ol_1-6_1	89.8358		1.04881	96.5846	246.144	50.4245	1024.77	6.19022		8.33166	256.108	n.a.	148.283	2836.94	10.0147	56.9006	bdl		n.a.	n.a.	n.a.	n.a.	n.a.	n.a.	n.a.	n.a.	n.a.	n.a.	n.a.	n.a.	n.a.	n.a.	n.a.	n.a.	n.a.	n.a.	n.a.	n.a.	n.a.	n.a.	n.a.	n.a.	n.a.	n.a.	n.a.	n.a.	n.a.
		Ter-3-2_1-2_Ol_1-7_1	90.393		1.67227	117.503	164.912	41.8037	1108.53	5.67743	80.2039	10.3639	341.881	n.a.	134.443	2653.05	5.48726	64.6025	bdl		n.a.	n.a.	n.a.	n.a.	n.a.	n.a.	n.a.	n.a.	n.a.	n.a.	n.a.	n.a.	n.a.	n.a.	n.a.	n.a.	n.a.	n.a.	n.a.	n.a.	n.a.	n.a.	n.a.	n.a.	n.a.	n.a.	n.a.	n.a.	n.a.
		Ter-3-2_1-2_Ol_2-7_1-1	90.4077		1.77078	120.579	171.817	42.6246	817.897	5.60566	79.8459	10.6545	298.679	n.a.	131.981	2663.26	5.29538	58.7032	bdl		n.a.	n.a.	n.a.	n.a.	n.a.	n.a.	n.a.	n.a.	n.a.	n.a.	n.a.	n.a.	n.a.	n.a.	n.a.	n.a.	n.a.	n.a.	n.a.	n.a.	n.a.	n.a.	n.a.	n.a.	n.a.	n.a.	n.a.	n.a.	n.a.
		Ter-3-2_1-2_Ol_2-7_2-1	90.4194		2.93776	128.458	180.932	44.7596	3277.54	5.56464	77.8825	10.7778	315.967	n.a.	131.548	2651.47	5.37402	57.2473	bdl		n.a.	n.a.	n.a.	n.a.	n.a.	n.a.	n.a.	n.a.	n.a.	n.a.	n.a.	n.a.	n.a.	n.a.	n.a.	n.a.	n.a.	n.a.	n.a.	n.a.	n.a.	n.a.	n.a.	n.a.	n.a.	n.a.	n.a.	n.a.	n.a.
		Ter-3-2_1-2_Ol_4-6_1	90.0648		1.83894	105.599	154.861	47.2522	790.339	6.42557	78.0948	9.85643	256.166	n.a.	137.56	2695.48	5.22895	63.4527	bdl		n.a.	n.a.	n.a.	n.a.	n.a.	n.a.	n.a.	n.a.	n.a.	n.a.	n.a.	n.a.	n.a.	n.a.	n.a.	n.a.	n.a.	n.a.	n.a.	n.a.	n.a.	n.a.	n.a.	n.a.	n.a.	n.a.	n.a.	n.a.	n.a.
		Ter-3-2_1-2_Ol_5-5_1-1	90.4153		1.68515	83.3487	198.323	34.2172	931.836	6.018	8.97297	9.76023	255.565	n.a.	133.681	2878.59	6.44864	63.0395	bdl		n.a.	n.a.	n.a.	n.a.	n.a.	n.a.	n.a.	n.a.	n.a.	n.a.	n.a.	n.a.	n.a.	n.a.	n.a.	n.a.	n.a.	n.a.	n.a.	n.a.	n.a.	n.a.	n.a.	n.a.	n.a.	n.a.	n.a.	n.a.	n.a.
		Ter-3-2_1-2_Ol_5-5_2-1	90.4022		1.74773	87.0971	193.347	33.2702	944.005	6.11611	8.78483	9.97434	264.777	n.a.	134.438	2895.09	6.20906	63.8318	bdl		n.a.	n.a.	n.a.	n.a.	n.a.	n.a.	n.a.	n.a.	n.a.	n.a.	n.a.	n.a.	n.a.	n.a.	n.a.	n.a.	n.a.	n.a.	n.a.	n.a.	n.a.	n.a.	n.a.	n.a.	n.a.	n.a.	n.a.	n.a.	n.a.
		Ter-3-2_1-2_Ol_5-10_1	90.2167		1.8985	108.075	152.455	40.4361	806.439	7.48933	77.6819	9.73492	231.266	n.a.	138.766	2674.26	5.29209	68.1807	bdl		n.a.	n.a.	n.a.	n.a.	n.a.	n.a.	n.a.	n.a.	n.a.	n.a.	n.a.	n.a.	n.a.	n.a.	n.a.	n.a.	n.a.	n.a.	n.a.	n.a.	n.a.	n.a.	n.a.	n.a.	n.a.	n.a.	n.a.	n.a.	n.a.
		Ter-3-2_1-2_Ol_5-10_2	89.8625		1.90879	116.15	164.378	39.4754	858.999	7.19403	77.4488	9.85288	244.486	n.a.	137.782	2660.12	5.34579	69.2907	bdl		n.a.	n.a.	n.a.	n.a.	n.a.	n.a.	n.a.	n.a.	n.a.	n.a.	n.a.	n.a.	n.a.	n.a.	n.a.	n.a.	n.a.	n.a.	n.a.	n.a.	n.a.	n.a.	n.a.	n.a.	n.a.	n.a.	n.a.	n.a.	n.a.
		Sh-3-2_2_3_16	89.7752		2.5	166.53	260.07	n.a.	876.78	1.86	30.15	10.23	428.7	891.25	141.98	2995.78	7.44	85.83	0.046		bdl	bdl	0.64	bdl	bdl	bdl	bdl	0.47	bdl	0.236	0.046	bdl	0.062	bdl	0.017	bdl	0.109	bdl	bdl	0.52	0.0104	bdl	bdl	bdl	bdl	bdl	bdl	bdl	0.02
		Sh-3-2_2_3_17	89.7916		5.04	171.02	273.92	n.a.	973	2.22	22.72	10.92	434.07	885.49	135.3	2903.86	9.89	75.82	bdl		bdl	7.47	bdl	bdl	bdl	bdl	0.47	2.87	bdl	bdl	bdl	0.4	bdl	bdl	bdl	bdl	bdl	bdl	bdl	7.15	0.015	0.0074	0.0063	bdl	0.044	bdl	bdl	bdl	bdl
	G2a	Ter-3-2_1-2_Ol_1-3_1	86.3471		2.37061	64.225	98.7397	62.1399	635.977	5.92466	181.701	7.02206	109.35	n.a.	142.158	2193.32	4.30776	101.27	bdl		n.a.	n.a.	n.a.	n.a.	n.a.	n.a.	n.a.	n.a.	n.a.	n.a.	n.a.	n.a.	n.a.	n.a.	n.a.	n.a.	n.a.	n.a.	n.a.	n.a.	n.a.	n.a.	n.a.	n.a.	n.a.	n.a.	n.a.	n.a.	n.a.
		Ter-3-2_1-2_Ol_3-4_1	86.1969		2.30835	66.0308	100.487	55.4408	467.145	5.4822	184.71	7.71074	106.955	n.a.	145.716	2161.1	3.89498	105.15	bdl		n.a.	n.a.	n.a.	n.a.	n.a.	n.a.	n.a.	n.a.	n.a.	n.a.	n.a.	n.a.	n.a.	n.a.	n.a.	n.a.	n.a.	n.a.	n.a.	n.a.	n.a.	n.a.	n.a.	n.a.	n.a.	n.a.	n.a.	n.a.	n.a.
		Ter-3-2_1-2_Ol_3-5_1	86.3734		2.39708	82.846	107.671	55.0994	540.773	5.66941	176.474	7.93212	143.215	n.a.	146.87	2210.61	4.71133	103.731	bdl		n.a.	n.a.	n.a.	n.a.	n.a.	n.a.	n.a.	n.a.	n.a.	n.a.	n.a.	n.a.	n.a.	n.a.	n.a.	n.a.	n.a.	n.a.	n.a.	n.a.	n.a.	n.a.	n.a.	n.a.	n.a.	n.a.	n.a.	n.a.	n.a.
		Ter-3-2_1-2_Ol_3-13_1-1	88.0491		2.33263	54.6427	43.0142	77.9447	393.453	5.66478	138.334	5.47193	153.42	n.a.	141.76	2926.52	2.13329	83.5524	bdl		n.a.	n.a.	n.a.	n.a.	n.a.	n.a.	n.a.	n.a.	n.a.	n.a.	n.a.	n.a.	n.a.	n.a.	n.a.	n.a.	n.a.	n.a.	n.a.	n.a.	n.a.	n.a.	n.a.	n.a.	n.a.	n.a.	n.a.	n.a.	n.a.
		Ter-3-2_1-2_Ol_3-13_2-1	88.0285		2.37385	58.9451	46.4675	78.6735	405.679	5.70055	140.069	5.45844	165.508	n.a.	140.026	2912.38	2.10806	84.7496	bdl		n.a.	n.a.	n.a.	n.a.	n.a.	n.a.	n.a.	n.a.	n.a.	n.a.	n.a.	n.a.	n.a.	n.a.	n.a.	n.a.	n.a.	n.a.	n.a.	n.a.	n.a.	n.a.	n.a.	n.a.	n.a.	n.a.	n.a.	n.a.	n.a.
		Ter-3-2_1-2_Ol_5-7_1-1	85.1805		2.43775	86.62	105.742	76.5874	576.909	6.70039	211.297	9.69878	148.614	n.a.	167.139	2537.52	4.01756	106.841	bdl		n.a.	n.a.	n.a.	n.a.	n.a.	n.a.	n.a.	n.a.	n.a.	n.a.	n.a.	n.a.	n.a.	n.a.	n.a.	n.a.	n.a.	n.a.	n.a.	n.a.	n.a.	n.a.	n.a.	n.a.	n.a.	n.a.	n.a.	n.a.	n.a.
		Ter-3-2_1-2_Ol_5-7_2-1	85.1287		2.35908	87.6662	104.917	73.97	572.608	6.66381	210.317	9.55073	147.938	n.a.	166.571	2526.52	4.05145	104.782	bdl		n.a.	n.a.	n.a.	n.a.	n.a.	n.a.	n.a.	n.a.	n.a.	n.a.	n.a.	n.a.	n.a.	n.a.	n.a.	n.a.	n.a.	n.a.	n.a.	n.a.	n.a.	n.a.	n.a.	n.a.	n.a.	n.a.	n.a.	n.a.	n.a.
		Sh-Ter-1-2_Ol_1-5-2	86.4537		3.07	184.16	232.81	n.a.	785.26	2.14	183.85	8.1	217.4	961.2	158.06	2851.7	5.06	99.05	bdl		bdl	2.7	0.66	bdl	bdl	bdl	bdl	bdl	bdl	bdl	bdl	0.4	bdl	bdl	bdl	bdl	bdl	bdl	bdl	bdl	0.018	bdl	bdl	bdl	bdl	bdl	bdl	bdl	0.068
		Sh-Ter-1-2_Ol_2-8-7	88.0748		1.58	222.45	299.83	n.a.	735.64	2.49	138.79	10.17	345.47	933.84	136.74	2646.08	3.81	86.46	bdl		0.34	bdl	bdl	bdl	bdl	bdl	bdl	bdl	bdl	bdl	bdl	0.44	bdl	bdl	0.022	0.32	bdl	bdl	0.022	bdl	bdl	bdl	bdl	0.033	0.038	bdl	bdl	0.0058	bdl
		Sh-Ter-1-2_Ol_2-8-8	88.0881		2.49	220.92	306.56	n.a.	797.11	2.46	157.56	11.45	349.61	938.8	133.63	2612.8	10.45	88.88	bdl		bdl	3.29	0.48	bdl	2.11	bdl	bdl	bdl	bdl	0.14	bdl	0.13	0.036	bdl	0.025	bdl	bdl	bdl	bdl	0.041	bdl	0.0055	bdl	bdl	bdl	bdl	bdl	bdl	bdl
		Sh-Ter-1-2_Ol_8-3-26	87.7535		2.72	57.71	43.74	n.a.	359.6	1.96	87.5	3.98	98.93	1046.46	132.31	2323.21	4.88	93.37	0.095		0.32	bdl	0.154	1.91	bdl	bdl	0.212	bdl	0.058	0.36	0.095	bdl	bdl	bdl	bdl	bdl	bdl	bdl	0.036	bdl	0.036	0.021	0.04	0.107	0.03	0.031	0.065	0.023	0.078
		Sh-3-2_1_1_2	87.4328		2.16	225.32	325.2	n.a.	651.94	2.62	157.34	10.59	215.3	906.71	151.69	2959.25	7.45	109.3	bdl		bdl	5.82	bdl	1.55	bdl	bdl	bdl	bdl	bdl	bdl	bdl	0.25	0.024	bdl	0.029	bdl	bdl	bdl	bdl	bdl	0.0091	bdl	0.0075	0.023	0.027	bdl	bdl	0.0085	0.018
		Sh-3-2_2_5_20	86.2254		2.37	114.75	130.07	n.a.	333.36	1.97	190.79	6.66	147.1	1024.05	145.33	2152.41	bdl	110.22	bdl		0.91	3.2	0.49	bdl	bdl	bdl	bdl	bdl	bdl	bdl	bdl	bdl	bdl	bdl	0.044	bdl	0.09	bdl	bdl	0.081	bdl	bdl	bdl	bdl	0.033	0.026	0.046	0.0052	bdl
		Sh-3-2_2_5_21	86.5262		3.63	151.78	174.78	n.a.	610.82	1.99	165.01	8.22	259.38	972.44	150.57	2237.51	8.23	97.04	bdl		bdl	4.85	bdl	bdl	bdl	bdl	bdl	bdl	0.233	bdl	bdl	bdl	0.054	0.082	bdl	bdl	bdl	bdl	bdl	0.093	bdl	bdl	bdl	bdl	0.025	bdl	bdl	bdl	bdl
		Sh-3-2_2_6_22	86.4185		2.42	133.35	143.65	n.a.	627.93	2.07	147.38	6.61	247.29	926.04	150.44	2641.91	7.97	99.01	bdl		0.88	bdl	bdl	bdl	bdl	bdl	bdl	0.25	bdl	bdl	bdl	0.21	bdl	bdl	bdl	0.182	bdl	bdl	0.0069	2.04	bdl	0.055	bdl	bdl	0.093	0.024	bdl	bdl	bdl
		Sh-3-2_1_5_8	84.6702		3.94	137.28	158.93	n.a.	550.22	1.82	193.36	8.17	82.15	1036.83	154.48	1977.15	7.49	130.96	0.023		bdl	4.62	0.55	bdl	bdl	bdl	bdl	1.39	bdl	bdl	0.023	bdl	0.028	bdl	0.021	bdl	bdl	bdl	0.035	1	bdl	0.0098	0.0042	bdl	bdl	0.0075	bdl	bdl	bdl
		Sh-3-2_1_5_9	84.8668		2.62	125.58	162.52	n.a.	510.23	1.95	162.66	7.38	105.95	976.58	153.46	1925.35	7.91	127.06	bdl		bdl	bdl	bdl	bdl	bdl	bdl	bdl	bdl	bdl	bdl	bdl	bdl	bdl	bdl	bdl	bdl	bdl	bdl	bdl	0.073	0.0154	bdl	bdl	bdl	bdl	0.016	bdl	bdl	0.02
		Sh-3-2_2_1_12	84.7228		2.8	69.75	69.44	n.a.	247.9	2.26	85.16	4.7	239.04	1326.78	155.36	2319.52	4.45	112.55	bdl		bdl	3.86	bdl	1.72	bdl	bdl	bdl	0.43	bdl	0.47	bdl	bdl	0.104	bdl	0.032	bdl	bdl	bdl	bdl	bdl	0.053	0.029	bdl	0.092	bdl	0.036	bdl	0.027	0.023
		Sh-Ter-1-2_Ol_5-6-21	84.6119		2.75	95.27	79.42	n.a.	391.6	2.18	151.32	6.65	96.63	1068.12	172.82	2446.78	bdl	120.35	bdl		bdl	1.79	bdl	bdl	bdl	bdl	bdl	bdl	bdl	bdl	bdl	bdl	bdl	0.159	bdl	bdl	bdl	bdl	bdl	0.043	0.018	bdl	bdl	bdl	0.035	bdl	bdl	0.021	0.022
	G2b	Ter-3-2_1-2_Ol_1-4_1	86.7362		2.13616	102.855	165.008	104.017	1302.89	5.99297	144.737	8.28455	129.603	n.a.	154.048	3030.26	5.42006	106.021	bdl		n.a.	n.a.	n.a.	n.a.	n.a.	n.a.	n.a.	n.a.	n.a.	n.a.	n.a.	n.a.	n.a.	n.a.	n.a.	n.a.	n.a.	n.a.	n.a.	n.a.	n.a.	n.a.	n.a.	n.a.	n.a.	n.a.	n.a.	n.a.	n.a.
		Ter-3-2_1-2_Ol_3-6_1	85.6341		1.83698	73.1153	96.1409	59.781	854.851	5.9634	169.239	6.02592	110.768	n.a.	163.78	2843.22	3.02238	105.481	bdl		n.a.	n.a.	n.a.	n.a.	n.a.	n.a.	n.a.	n.a.	n.a.	n.a.	n.a.	n.a.	n.a.	n.a.	n.a.	n.a.	n.a.	n.a.	n.a.	n.a.	n.a.	n.a.	n.a.	n.a.	n.a.	n.a.	n.a.	n.a.	n.a.
		Ter-3-2_1-2_Ol_4-4_1-1	86.8229		2.35662	101.754	161.443	97.7886	919.424	6.57442	140.735	8.73751	123.287	n.a.	162.425	3034.97	5.49175	108.123	bdl		n.a.	n.a.	n.a.	n.a.	n.a.	n.a.	n.a.	n.a.	n.a.	n.a.	n.a.	n.a.	n.a.	n.a.	n.a.	n.a.	n.a.	n.a.	n.a.	n.a.	n.a.	n.a.	n.a.	n.a.	n.a.	n.a.	n.a.	n.a.	n.a.
		Ter-3-2_1-2_Ol_4-4_2-1	86.8425		2.25332	104.158	159.147	88.6235	909.254	6.28783	132.654	8.55409	126.985	n.a.	159.965	3027.9	5.46519	108.315	bdl		n.a.	n.a.	n.a.	n.a.	n.a.	n.a.	n.a.	n.a.	n.a.	n.a.	n.a.	n.a.	n.a.	n.a.	n.a.	n.a.	n.a.	n.a.	n.a.	n.a.	n.a.	n.a.	n.a.	n.a.	n.a.	n.a.	n.a.	n.a.	n.a.
		Ter-3-2_1-2_Ol_4-7_1	86.5846		2.58308	97.1578	143.916	62.0163	796.457	6.68536	178.994	8.85531	136.762	n.a.	167.178	2814.15	5.68718	110.225	bdl		n.a.	n.a.	n.a.	n.a.	n.a.	n.a.	n.a.	n.a.	n.a.	n.a.	n.a.	n.a.	n.a.	n.a.	n.a.	n.a.	n.a.	n.a.	n.a.	n.a.	n.a.	n.a.	n.a.	n.a.	n.a.	n.a.	n.a.	n.a.	n.a.
		Ter-3-2_1-2_Ol_4-10_1	87.6525		2.16188	109.601	169.269	68.1698	847.673	5.90226	146.616	9.99567	121.576	n.a.	147.203	2884.09	5.17253	101.749	bdl		n.a.	n.a.	n.a.	n.a.	n.a.	n.a.	n.a.	n.a.	n.a.	n.a.	n.a.	n.a.	n.a.	n.a.	n.a.	n.a.	n.a.	n.a.	n.a.	n.a.	n.a.	n.a.	n.a.	n.a.	n.a.	n.a.	n.a.	n.a.	n.a.
		Ter-3-2_1-2_Ol_4-12_1	87.7173		2.16995	127.656	194.47	69.7177	949.728	5.84867	143.328	10.3166	143.32	n.a.	148.666	2863.65	5.18237	99.2234	bdl		n.a.	n.a.	n.a.	n.a.	n.a.	n.a.	n.a.	n.a.	n.a.	n.a.	n.a.	n.a.	n.a.	n.a.	n.a.	n.a.	n.a.	n.a.	n.a.	n.a.	n.a.	n.a.	n.a.	n.a.	n.a.	n.a.	n.a.	n.a.	n.a.
		Ter-3-2_1-2_Ol_5-1_1-1	86.2993		2.22014	111.431	159.846	66.6544	847.014	6.25836	133.947	8.4492	155.054	n.a.	161.903	3051.47	5.34028	106.041	bdl		n.a.	n.a.	n.a.	n.a.	n.a.	n.a.	n.a.	n.a.	n.a.	n.a.	n.a.	n.a.	n.a.	n.a.	n.a.	n.a.	n.a.	n.a.	n.a.	n.a.	n.a.	n.a.	n.a.	n.a.	n.a.	n.a.	n.a.	n.a.	n.a.
		Ter-3-2_1-2_Ol_5-1_2-1	86.4912		2.467	110.158	169.839	78.7878	1197.53	6.50957	157.473	8.59132	151.588	n.a.	161.393	2998.82	4.89311	82.2571	bdl		n.a.	n.a.	n.a.	n.a.	n.a.	n.a.	n.a.	n.a.	n.a.	n.a.	n.a.	n.a.	n.a.	n.a.	n.a.	n.a.	n.a.	n.a.	n.a.	n.a.	n.a.	n.a.	n.a.	n.a.	n.a.	n.a.	n.a.	n.a.	n.a.
		Ter-3-2_1-2_Ol_5-3_1	87.5367		2.25998	129.023	234.369	77.4225	916.293	6.54643	160.508	9.98855	140.125	n.a.	148.963	2872.3	5.10643	100.439	bdl		n.a.	n.a.	n.a.	n.a.	n.a.	n.a.	n.a.	n.a.	n.a.	n.a.	n.a.	n.a.	n.a.	n.a.	n.a.	n.a.	n.a.	n.a.	n.a.	n.a.	n.a.	n.a.	n.a.	n.a.	n.a.	n.a.	n.a.	n.a.	n.a.
		Ter-3-2_1-2_Ol_5-8_1-1	87.2462		2.02801	117.744	182.317	50.8851	1113.51	7.39465	135.377	9.1231	163.271	n.a.	156.954	2769.35	4.34525	88.9539	bdl		n.a.	n.a.	n.a.	n.a.	n.a.	n.a.	n.a.	n.a.	n.a.	n.a.	n.a.	n.a.	n.a.	n.a.	n.a.	n.a.	n.a.	n.a.	n.a.	n.a.	n.a.	n.a.	n.a.	n.a.	n.a.	n.a.	n.a.	n.a.	n.a.
		Ter-3-2_1-2_Ol_5-8_2-1	87.2806		2.06457	115.346	175.954	52.5998	1113.85	7.47473	131.62	9.29821	164.025	n.a.	155.788	2775.64	4.28954	92.3804	bdl		n.a.	n.a.	n.a.	n.a.	n.a.	n.a.	n.a.	n.a.	n.a.	n.a.	n.a.	n.a.	n.a.	n.a.	n.a.	n.a.	n.a.	n.a.	n.a.	n.a.	n.a.	n.a.	n.a.	n.a.	n.a.	n.a.	n.a.	n.a.	n.a.
		Ter-3-2_1-2_Ol_5-9_1	87.6205		2.11288	122.278	210.002	71.8922	1001.96	7.46981	159.247	10.3508	108.409	n.a.	154.126	2887.23	5.19382	100.308	bdl		n.a.	n.a.	n.a.	n.a.	n.a.	n.a.	n.a.	n.a.	n.a.	n.a.	n.a.	n.a.	n.a.	n.a.	n.a.	n.a.	n.a.	n.a.	n.a.	n.a.	n.a.	n.a.	n.a.	n.a.	n.a.	n.a.	n.a.	n.a.	n.a.
		Ter-3-2_1-2_Ol_2-2_1	85.962		1.96729	56.7705	107.31	64.0693	1130.44	6.25678	189.281	4.73448	150.679	n.a.	164.587	2684.48	3.90219	93.8047	bdl		n.a.	n.a.	n.a.	n.a.	n.a.	n.a.	n.a.	n.a.	n.a.	n.a.	n.a.	n.a.	n.a.	n.a.	n.a.	n.a.	n.a.	n.a.	n.a.	n.a.	n.a.	n.a.	n.a.	n.a.	n.a.	n.a.	n.a.	n.a.	n.a.
		Ter-3-2_1-2_Ol_3-1_1	85.9926		1.94395	57.9887	106.793	68.1159	1122.51	6.03686	192.241	4.69754	148.934	n.a.	164.286	2682.91	3.67182	94.6763	bdl		n.a.	n.a.	n.a.	n.a.	n.a.	n.a.	n.a.	n.a.	n.a.	n.a.	n.a.	n.a.	n.a.	n.a.	n.a.	n.a.	n.a.	n.a.	n.a.	n.a.	n.a.	n.a.	n.a.	n.a.	n.a.	n.a.	n.a.	n.a.	n.a.
		Ter-3-2_1-2_Ol_3-9_1	86.0186		2.00884	51.1632	90.5768	66.1019	1014.94	6.35519	182.163	4.62809	145.594	n.a.	163.213	2698.62	3.54108	96.3698	bdl		n.a.	n.a.	n.a.	n.a.	n.a.	n.a.	n.a.	n.a.	n.a.	n.a.	n.a.	n.a.	n.a.	n.a.	n.a.	n.a.	n.a.	n.a.	n.a.	n.a.	n.a.	n.a.	n.a.	n.a.	n.a.	n.a.	n.a.	n.a.	n.a.
		Ter-3-2_1-2_Ol_4-3_1	86.0081		2.05836	54.7067	107.301	78.0656	1173.84	6.85246	190.033	4.6535	140.808	n.a.	166.139	2693.12	3.60254	95.5544	bdl		n.a.	n.a.	n.a.	n.a.	n.a.	n.a.	n.a.	n.a.	n.a.	n.a.	n.a.	n.a.	n.a.	n.a.	n.a.	n.a.	n.a.	n.a.	n.a.	n.a.	n.a.	n.a.	n.a.	n.a.	n.a.	n.a.	n.a.	n.a.	n.a.
		Ter-3-2_1-2_Ol_4-9_1	86.0706		2.02231	56.9677	98.7665	74.2431	1097.35	6.54177	177.325	4.53453	145.769	n.a.	169.078	2724.56	3.60853	97.7952	bdl		n.a.	n.a.	n.a.	n.a.	n.a.	n.a.	n.a.	n.a.	n.a.	n.a.	n.a.	n.a.	n.a.	n.a.	n.a.	n.a.	n.a.	n.a.	n.a.	n.a.	n.a.	n.a.	n.a.	n.a.	n.a.	n.a.	n.a.	n.a.	n.a.
		Sh-Ter-1-2_Ol_1-1-1	86.291		bdl	240.34	330.04	n.a.	955.87	2.81	161.36	9.69	272.52	984.91	164.69	2766.84	11.8	64.58	bdl		0.35	4.1	0.33	bdl	bdl	bdl	5.06	2.68	0.26	1.54	bdl	bdl	0.25	0.081	0.022	bdl	bdl	bdl	0.805	3.16	1.44	2.65	0.321	1.53	0.32	0.061	0.085	bdl	0.079
		Sh-Ter-1-2_Ol_5-8-23	86.3032		bdl	325.08	258.39	n.a.	894.17	2.5	154.83	8.98	263.25	990.36	163.29	2941.51	6.56	117.56	bdl		0.36	10.15	bdl	bdl	bdl	bdl	20.98	6.1	bdl	bdl	bdl	0.27	0.04	bdl	bdl	0.33	bdl	bdl	1.54	5.88	bdl	bdl	bdl	bdl	0.035	bdl	bdl	bdl	bdl
		Sh-3-2_1_1_1	87.0693		2.35	233.45	317.35	n.a.	847.98	2.18	162.96	11.78	224.13	905.55	152.78	2984.97	10.53	109.79	bdl		bdl	2.67	0.82	bdl	bdl	bdl	bdl	bdl	bdl	bdl	bdl	bdl	bdl	bdl	bdl	bdl	bdl	bdl	0.035	bdl	bdl	bdl	bdl	0.069	bdl	bdl	bdl	bdl	bdl
		Sh-3-2_1_7_11	87.4311		bdl	127.53	122.67	n.a.	895.45	2.35	184.51	5.49	240.51	911.48	139.07	2501.38	5.54	105.24	0.138		bdl	15.28	bdl	bdl	bdl	bdl	1.48	16.94	bdl	1.19	0.138	bdl	bdl	bdl	bdl	bdl	bdl	bdl	bdl	1.29	bdl	bdl	bdl	bdl	bdl	0.046	bdl	bdl	0.059
		Sh-3-2_3_1_23	85.8352		2.07	107.94	153.53	n.a.	891.06	2.75	183.83	4.54	260.23	1052.86	168.01	2571.55	4.88	105.05	bdl		0.47	bdl	bdl	bdl	bdl	bdl	bdl	bdl	bdl	0.41	bdl	bdl	0.105	0.107	0.065	0.54	bdl	bdl	bdl	bdl	0.017	bdl	bdl	bdl	bdl	bdl	bdl	0.023	bdl
		Sh-3-2_3_2_24	85.5425		1.76	106.9	162.36	n.a.	992.1	2.88	202.33	4.96	264.01	1116.77	167.19	2609.31	5.68	97.36	bdl		bdl	bdl	bdl	bdl	bdl	bdl	bdl	bdl	0.13	0.143	bdl	0.36	bdl	0.174	bdl	bdl	bdl	bdl	0.0118	bdl	0.0067	0.0136	bdl	bdl	bdl	bdl	bdl	bdl	0.025
		Sh-3-2_2_4_18	85.9067		2.75	103.08	155.32	n.a.	926.51	2.85	194.19	3.46	251.23	1123.95	165.08	2635.59	5.74	99.65	bdl		0.57	4.24	bdl	bdl	bdl	bdl	bdl	bdl	bdl	bdl	bdl	bdl	0.066	bdl	bdl	bdl	bdl	bdl	bdl	bdl	bdl	bdl	bdl	bdl	0.032	bdl	bdl	bdl	0.041
		Sh-3-2_2_4_19	85.8033		1.5	102.69	153.29	n.a.	1028.72	2.35	189.4	4.14	261.89	1143.25	161.59	2704.86	bdl	97.27	bdl		0.52	3.13	0.52	bdl	bdl	bdl	bdl	bdl	bdl	0.75	bdl	0.39	bdl	0.185	0.049	bdl	bdl	bdl	0.0172	0.035	0.0197	0.0098	0.025	bdl	0.029	0.023	0.02	0.027	0.037
		Sh-3-2_1_4_5	85.8364		3.87	109.49	168.45	n.a.	1152.89	2.97	213.96	4.63	259.15	1075.73	169.32	2786.11	6.79	94.53	bdl		bdl	5.15	bdl	1.55	bdl	bdl	0.21	1.53	0.115	0.22	bdl	0.54	bdl	bdl	0.0138	bdl	0.032	bdl	0.023	0.4	0.0065	bdl	bdl	bdl	bdl	0.0098	bdl	0.006	0.025
		Sh-3-2_1_4_6	84.637		1.91	102.02	160.12	n.a.	836.99	2.68	201.56	3.87	255.99	1139.84	164.01	2562.39	4.91	109.78	0.135		bdl	2.46	bdl	bdl	bdl	bdl	bdl	bdl	0.14	bdl	0.135	bdl	0.063	bdl	0.0124	bdl	bdl	bdl	bdl	bdl	0.0116	bdl	bdl	0.03	bdl	bdl	bdl	0.0054	bdl
		Sh-Ter-1-2_Ol_4-13-19	84.3827		bdl	204.37	174.13	n.a.	1192.82	1.37	158.94	7.92	87.2	1048.44	168.97	2480.09	bdl	117.97	0.221		bdl	6.81	0.45	bdl	bdl	bdl	1.86	3.57	bdl	1.63	0.221	bdl	0.16	0.31	bdl	0.61	bdl	bdl	0.82	12.81	0.024	0.095	0.02	bdl	bdl	bdl	bdl	bdl	bdl
	G3	Ter-3-2_1-2_Ol_1-1_1	82.0863		2.18053	59.0151	68.0693	56.6245	779.254	5.45052	115.234	5.12789	55.4666	n.a.	148.261	1282.51	3.27871	117.538	bdl		n.a.	n.a.	n.a.	n.a.	n.a.	n.a.	n.a.	n.a.	n.a.	n.a.	n.a.	n.a.	n.a.	n.a.	n.a.	n.a.	n.a.	n.a.	n.a.	n.a.	n.a.	n.a.	n.a.	n.a.	n.a.	n.a.	n.a.	n.a.	n.a.
		Ter-3-2_1-2_Ol_1-9_1	83.703		2.72795	66.1892	72.685	75.0674	1877.62	6.6608	161.429	7.13609	79.5329	n.a.	198.618	1908.84	4.29553	141.258	bdl		n.a.	n.a.	n.a.	n.a.	n.a.	n.a.	n.a.	n.a.	n.a.	n.a.	n.a.	n.a.	n.a.	n.a.	n.a.	n.a.	n.a.	n.a.	n.a.	n.a.	n.a.	n.a.	n.a.	n.a.	n.a.	n.a.	n.a.	n.a.	n.a.
		Ter-3-2_1-2_Ol_1-10_1	83.3102		2.33967	99.2637	134.083	53.2622	1015.9	5.71081	208.303	10.0567	67.7659	n.a.	192.734	2356.78	5.36826	128.094	bdl		n.a.	n.a.	n.a.	n.a.	n.a.	n.a.	n.a.	n.a.	n.a.	n.a.	n.a.	n.a.	n.a.	n.a.	n.a.	n.a.	n.a.	n.a.	n.a.	n.a.	n.a.	n.a.	n.a.	n.a.	n.a.	n.a.	n.a.	n.a.	n.a.
		Ter-3-2_1-2_Ol_1-11_1	83.2735		2.2177	74.751	92.714	58.6549	773.261	5.5666	178.174	7.49164	52.1478	n.a.	178.031	2540.67	4.19689	133.852	bdl		n.a.	n.a.	n.a.	n.a.	n.a.	n.a.	n.a.	n.a.	n.a.	n.a.	n.a.	n.a.	n.a.	n.a.	n.a.	n.a.	n.a.	n.a.	n.a.	n.a.	n.a.	n.a.	n.a.	n.a.	n.a.	n.a.	n.a.	n.a.	n.a.
		Ter-3-2_1-2_Ol_2-1_1	81.7839		2.65885	60.6083	70.7062	56.1448	491.773	5.45796	163.583	6.72116	24.8409	n.a.	176.152	2300.98	2.53494	143.192	bdl		n.a.	n.a.	n.a.	n.a.	n.a.	n.a.	n.a.	n.a.	n.a.	n.a.	n.a.	n.a.	n.a.	n.a.	n.a.	n.a.	n.a.	n.a.	n.a.	n.a.	n.a.	n.a.	n.a.	n.a.	n.a.	n.a.	n.a.	n.a.	n.a.
		Ter-3-2_1-2_Ol_2-5_1	81.6377		4.3273	59.0221	65.3332	60.6076	719.542	5.8199	135.77	5.74915	40.9664	n.a.	168.728	1307.66	3.79068	135.511	bdl		n.a.	n.a.	n.a.	n.a.	n.a.	n.a.	n.a.	n.a.	n.a.	n.a.	n.a.	n.a.	n.a.	n.a.	n.a.	n.a.	n.a.	n.a.	n.a.	n.a.	n.a.	n.a.	n.a.	n.a.	n.a.	n.a.	n.a.	n.a.	n.a.
		Ter-3-2_1-2_Ol_2-9_1	83.3079		2.54975	77.8657	118.386	92.0621	838.528	6.05069	218.791	10.5545	81.0826	n.a.	191.918	2368.57	5.38296	126.963	bdl		n.a.	n.a.	n.a.	n.a.	n.a.	n.a.	n.a.	n.a.	n.a.	n.a.	n.a.	n.a.	n.a.	n.a.	n.a.	n.a.	n.a.	n.a.	n.a.	n.a.	n.a.	n.a.	n.a.	n.a.	n.a.	n.a.	n.a.	n.a.	n.a.
		Ter-3-2_1-2_Ol_2-10_1	81.174		2.46955	44.8766	36.5834	63.7796	525.454	5.58222	164.039	5.47249	14.6932	n.a.	173.853	2074.66	2.22408	152.68	bdl		n.a.	n.a.	n.a.	n.a.	n.a.	n.a.	n.a.	n.a.	n.a.	n.a.	n.a.	n.a.	n.a.	n.a.	n.a.	n.a.	n.a.	n.a.	n.a.	n.a.	n.a.	n.a.	n.a.	n.a.	n.a.	n.a.	n.a.	n.a.	n.a.
		Ter-3-2_1-2_Ol_2-11_1	82.2555		2.81667	59.0866	61.8372	60.2492	563.806	5.8374	214.995	6.61138	44.1245	n.a.	179.584	1423.97	3.70105	156.015	bdl		n.a.	n.a.	n.a.	n.a.	n.a.	n.a.	n.a.	n.a.	n.a.	n.a.	n.a.	n.a.	n.a.	n.a.	n.a.	n.a.	n.a.	n.a.	n.a.	n.a.	n.a.	n.a.	n.a.	n.a.	n.a.	n.a.	n.a.	n.a.	n.a.
		Ter-3-2_1-2_Ol_3-2_1	82.548		2.6978	67.4091	64.6529	50.9823	507.292	5.61794	151.851	5.56573	84.8681	n.a.	151.69	1605.5	2.02721	148.583	bdl		n.a.	n.a.	n.a.	n.a.	n.a.	n.a.	n.a.	n.a.	n.a.	n.a.	n.a.	n.a.	n.a.	n.a.	n.a.	n.a.	n.a.	n.a.	n.a.	n.a.	n.a.	n.a.	n.a.	n.a.	n.a.	n.a.	n.a.	n.a.	n.a.
		Ter-3-2_1-2_Ol_3-3_1	83.5741		2.66992	82.8773	78.3536	63.2067	611.817	6.52181	143.115	7.13334	68.5969	n.a.	204.697	1718.66	4.8161	142.368	bdl		n.a.	n.a.	n.a.	n.a.	n.a.	n.a.	n.a.	n.a.	n.a.	n.a.	n.a.	n.a.	n.a.	n.a.	n.a.	n.a.	n.a.	n.a.	n.a.	n.a.	n.a.	n.a.	n.a.	n.a.	n.a.	n.a.	n.a.	n.a.	n.a.
		Ter-3-2_1-2_Ol_3-7_1	83.4384		3.9829	76.1818	108.222	55.4897	688.474	5.96698	231.322	9.09517	33.868	n.a.	161.421	1802.75	3.63878	109.105	bdl		n.a.	n.a.	n.a.	n.a.	n.a.	n.a.	n.a.	n.a.	n.a.	n.a.	n.a.	n.a.	n.a.	n.a.	n.a.	n.a.	n.a.	n.a.	n.a.	n.a.	n.a.	n.a.	n.a.	n.a.	n.a.	n.a.	n.a.	n.a.	n.a.
		Ter-3-2_1-2_Ol_3-11_1	81.3224		2.44689	45.0613	26.83	60.0335	432.894	5.80457	147.687	5.67653	17.9985	n.a.	169.321	2065.23	1.7302	141.612	bdl		n.a.	n.a.	n.a.	n.a.	n.a.	n.a.	n.a.	n.a.	n.a.	n.a.	n.a.	n.a.	n.a.	n.a.	n.a.	n.a.	n.a.	n.a.	n.a.	n.a.	n.a.	n.a.	n.a.	n.a.	n.a.	n.a.	n.a.	n.a.	n.a.
		Ter-3-2_1-2_Ol_3-12_1	81.4194		2.67234	49.3868	42.5726	56.5053	402.644	5.53167	121.459	5.19005	30.3141	n.a.	161.05	1205.5	2.2522	147.959	bdl		n.a.	n.a.	n.a.	n.a.	n.a.	n.a.	n.a.	n.a.	n.a.	n.a.	n.a.	n.a.	n.a.	n.a.	n.a.	n.a.	n.a.	n.a.	n.a.	n.a.	n.a.	n.a.	n.a.	n.a.	n.a.	n.a.	n.a.	n.a.	n.a.
		Ter-3-2_1-2_Ol_4-1_1	83.3392		2.43087	78.285	109.101	56.3288	661.773	6.343	214.595	8.75348	34.2864	n.a.	166.49	1809.82	3.74919	128.972	bdl		n.a.	n.a.	n.a.	n.a.	n.a.	n.a.	n.a.	n.a.	n.a.	n.a.	n.a.	n.a.	n.a.	n.a.	n.a.	n.a.	n.a.	n.a.	n.a.	n.a.	n.a.	n.a.	n.a.	n.a.	n.a.	n.a.	n.a.	n.a.	n.a.
		Ter-3-2_1-2_Ol_4-2_1	81.6312		2.49333	53.8073	55.8059	64.655	508.26	6.69078	184.712	5.72714	33.1773	n.a.	176.991	2121.02	2.89442	138.299	bdl		n.a.	n.a.	n.a.	n.a.	n.a.	n.a.	n.a.	n.a.	n.a.	n.a.	n.a.	n.a.	n.a.	n.a.	n.a.	n.a.	n.a.	n.a.	n.a.	n.a.	n.a.	n.a.	n.a.	n.a.	n.a.	n.a.	n.a.	n.a.	n.a.
		Ter-3-2_1-2_Ol_4-11_1-1	81.569		2.63099	51.4492	48.0294	56.0696	386.874	5.68276	116.096	5.26941	30.5125	n.a.	161.127	1214.15	3.05658	144.32	bdl		n.a.	n.a.	n.a.	n.a.	n.a.	n.a.	n.a.	n.a.	n.a.	n.a.	n.a.	n.a.	n.a.	n.a.	n.a.	n.a.	n.a.	n.a.	n.a.	n.a.	n.a.	n.a.	n.a.	n.a.	n.a.	n.a.	n.a.	n.a.	n.a.
		Ter-3-2_1-2_Ol_4-11_2-1	81.5354		2.61063	50.2862	48.5377	54.9734	404.99	5.57007	115.793	5.22428	34.5942	n.a.	159.823	1238.51	2.9628	144.25	bdl		n.a.	n.a.	n.a.	n.a.	n.a.	n.a.	n.a.	n.a.	n.a.	n.a.	n.a.	n.a.	n.a.	n.a.	n.a.	n.a.	n.a.	n.a.	n.a.	n.a.	n.a.	n.a.	n.a.	n.a.	n.a.	n.a.	n.a.	n.a.	n.a.
		Ter-3-2_1-2_Ol_5-2_1	82.9146		2.53901	61.8974	42.0225	60.1592	451.517	6.10568	162.218	5.1404	55.5147	n.a.	168.361	1881.34	1.67074	145.58	bdl		n.a.	n.a.	n.a.	n.a.	n.a.	n.a.	n.a.	n.a.	n.a.	n.a.	n.a.	n.a.	n.a.	n.a.	n.a.	n.a.	n.a.	n.a.	n.a.	n.a.	n.a.	n.a.	n.a.	n.a.	n.a.	n.a.	n.a.	n.a.	n.a.
		Ter-3-2_1-2_Ol_5-4_1	83.4036		2.49041	86.624	119.978	56.388	625.73	6.26601	223.651	9.03015	46.7664	n.a.	166.362	1820.83	3.8807	130.462	bdl		n.a.	n.a.	n.a.	n.a.	n.a.	n.a.	n.a.	n.a.	n.a.	n.a.	n.a.	n.a.	n.a.	n.a.	n.a.	n.a.	n.a.	n.a.	n.a.	n.a.	n.a.	n.a.	n.a.	n.a.	n.a.	n.a.	n.a.	n.a.	n.a.
		Ter-3-2_1-2_Ol_5-6_1-1	83.4977		2.44914	86.7825	118.225	52.8774	611.41	6.17601	217.259	8.99991	43.9287	n.a.	165.386	1816.11	3.51208	132.169	bdl		n.a.	n.a.	n.a.	n.a.	n.a.	n.a.	n.a.	n.a.	n.a.	n.a.	n.a.	n.a.	n.a.	n.a.	n.a.	n.a.	n.a.	n.a.	n.a.	n.a.	n.a.	n.a.	n.a.	n.a.	n.a.	n.a.	n.a.	n.a.	n.a.
		Ter-3-2_1-2_Ol_5-6_2-1	83.4656		bdl	90.9035	130.67	48.7949	3515.13	6.43758	228.728	9.26304	48.8667	n.a.	164.392	1811.39	3.90987	118.405	bdl		n.a.	n.a.	n.a.	n.a.	n.a.	n.a.	n.a.	n.a.	n.a.	n.a.	n.a.	n.a.	n.a.	n.a.	n.a.	n.a.	n.a.	n.a.	n.a.	n.a.	n.a.	n.a.	n.a.	n.a.	n.a.	n.a.	n.a.	n.a.	n.a.
		Ter-3-2_1-2_Ol_5-11_1	83.1856		2.47411	59.8157	47.3155	62.3741	517.744	7.18915	146.68	5.16472	41.3981	n.a.	173.709	1889.19	1.55092	144.802	bdl		n.a.	n.a.	n.a.	n.a.	n.a.	n.a.	n.a.	n.a.	n.a.	n.a.	n.a.	n.a.	n.a.	n.a.	n.a.	n.a.	n.a.	n.a.	n.a.	n.a.	n.a.	n.a.	n.a.	n.a.	n.a.	n.a.	n.a.	n.a.	n.a.
		Ter-3-2_1-2_Ol_7-4_1-1	82.187		2.55976	79.8168	bdl	63.9467	493.67	8.25174	222.386	8.39863	20.4784	n.a.	182.5	1952.85	3.375	151.179	bdl		n.a.	n.a.	n.a.	n.a.	n.a.	n.a.	n.a.	n.a.	n.a.	n.a.	n.a.	n.a.	n.a.	n.a.	n.a.	n.a.	n.a.	n.a.	n.a.	n.a.	n.a.	n.a.	n.a.	n.a.	n.a.	n.a.	n.a.	n.a.	n.a.
		Ter-3-2_1-2_Ol_7-4_2-1	82.3521		2.50248	79.6556	bdl	58.6072	501.452	8.1654	221.712	8.42254	18.8753	n.a.	182.162	1954.42	3.37482	152.847	bdl		n.a.	n.a.	n.a.	n.a.	n.a.	n.a.	n.a.	n.a.	n.a.	n.a.	n.a.	n.a.	n.a.	n.a.	n.a.	n.a.	n.a.	n.a.	n.a.	n.a.	n.a.	n.a.	n.a.	n.a.	n.a.	n.a.	n.a.	n.a.	n.a.
		Ter-3-2_1-2_Ol_7-9_1-1	82.8567		7.89982	18.4815	bdl	211.284	399.188	53.689	67.4768	1.53804	7.96215	n.a.	103.77	81.7289	0.123316	264.587	0.798713		n.a.	n.a.	n.a.	n.a.	n.a.	n.a.	n.a.	n.a.	n.a.	n.a.	n.a.	n.a.	n.a.	n.a.	n.a.	n.a.	n.a.	n.a.	n.a.	n.a.	n.a.	n.a.	n.a.	n.a.	n.a.	n.a.	n.a.	n.a.	n.a.
		Ter-3-2_1-2_Ol_7-9_2-1	82.8479		8.17018	19.3655	bdl	228.075	396.58	54.9293	70.529	1.48643	9.45282	n.a.	106.884	75.442	0.0708628	267.106	0.818007		n.a.	n.a.	n.a.	n.a.	n.a.	n.a.	n.a.	n.a.	n.a.	n.a.	n.a.	n.a.	n.a.	n.a.	n.a.	n.a.	n.a.	n.a.	n.a.	n.a.	n.a.	n.a.	n.a.	n.a.	n.a.	n.a.	n.a.	n.a.	n.a.
		Ter-3-2_1-2_Ol_7-11_1-1	83.739		2.49429	56.1118	bdl	59.0663	534.13	7.31291	163.036	6.25165	47.5192	n.a.	174.645	2419.65	2.32868	127.38	bdl		n.a.	n.a.	n.a.	n.a.	n.a.	n.a.	n.a.	n.a.	n.a.	n.a.	n.a.	n.a.	n.a.	n.a.	n.a.	n.a.	n.a.	n.a.	n.a.	n.a.	n.a.	n.a.	n.a.	n.a.	n.a.	n.a.	n.a.	n.a.	n.a.
		Ter-3-2_1-2_Ol_7-11_2-1	83.8122		2.36927	55.8284	bdl	57.6374	526.962	7.30637	166.757	6.27363	45.5524	n.a.	174.443	2419.65	2.3903	127.042	bdl		n.a.	n.a.	n.a.	n.a.	n.a.	n.a.	n.a.	n.a.	n.a.	n.a.	n.a.	n.a.	n.a.	n.a.	n.a.	n.a.	n.a.	n.a.	n.a.	n.a.	n.a.	n.a.	n.a.	n.a.	n.a.	n.a.	n.a.	n.a.	n.a.
		Sh-Ter-1-2_Ol_2-3-4	82.7287		3.93	118.81	89.49	n.a.	bdl	2.27	163.4	5.96	128.43	1170.16	150.97	1968.47	bdl	153.51	0.101		0.47	bdl	bdl	bdl	bdl	bdl	bdl	bdl	bdl	bdl	0.101	bdl	0.22	bdl	0.059	bdl	0.093	bdl	0.0076	0.129	bdl	0.0087	bdl	0.046	bdl	bdl	bdl	bdl	bdl
		Sh-Ter-1-2_Ol_2-7-6	82.9014		9.03	46.28	3.06	n.a.	206.12	11.42	52.44	0.46	8.68	1722.5	82.37	66.27	bdl	220.58	0.45		0.65	5.03	bdl	4.27	bdl	bdl	bdl	bdl	0.198	0.77	0.45	bdl	0.35	bdl	0.103	bdl	bdl	bdl	bdl	bdl	0.0121	bdl	bdl	bdl	bdl	0.0091	0.191	bdl	bdl
		Sh-Ter-1-2_Ol_2-15-9	82.0134		3.01	141.41	143.15	n.a.	394.6	1.44	204.58	8.66	65.84	1110.01	176.81	2103.5	6.54	138.09	bdl		bdl	2.82	0.45	bdl	bdl	bdl	0.197	bdl	0.109	0.4	bdl	bdl	bdl	0.088	0.027	bdl	0.101	bdl	bdl	0.069	0.0047	0.0047	bdl	bdl	bdl	bdl	bdl	bdl	bdl
		Sh-Ter-1-2_Ol_3-6-13	83.4648		3.46	115.64	88.4	n.a.	355.97	1.79	168.11	7.09	93.03	1099.58	171.11	2457.16	4.31	135.54	bdl		bdl	2.91	bdl	bdl	2.53	bdl	bdl	bdl	0.132	bdl	bdl	0.17	0.101	bdl	0.0088	bdl	bdl	bdl	0.0133	bdl	0.0076	bdl	bdl	bdl	bdl	bdl	0.096	bdl	bdl
		Sh-Ter-1-2_Ol_4-11-18	83.2575		13.53	27.33	1.36	n.a.	322.5	15.33	33.2	0.54	7.06	1188.62	62.23	15.75	bdl	168.75	0.23		bdl	2.65	bdl	2.79	bdl	bdl	0.74	1.1	0.133	0.49	0.23	bdl	0.125	bdl	0.103	bdl	0.155	bdl	0.235	9.11	bdl	0.042	0.028	bdl	bdl	0.0071	bdl	bdl	bdl
		Sh-Ter-1-2_Ol_5-7-22	83.7649		3.31	100.24	85.47	n.a.	418.61	2.14	160.57	6.33	93.32	1052.94	165.03	2363.81	4.44	112.91	bdl		0.36	bdl	bdl	bdl	bdl	bdl	bdl	bdl	bdl	0.56	bdl	bdl	bdl	bdl	bdl	bdl	bdl	bdl	0.031	bdl	0.029	bdl	bdl	0.091	0.034	bdl	0.074	bdl	0.044
		Sh-Ter-1-2_Ol_7-11-25	82.5373		2.27	137.47	153.85	n.a.	496.53	1.8	214.47	7.85	62.66	1070.93	166.86	1905.71	bdl	134.23	bdl		bdl	bdl	bdl	1.53	bdl	bdl	bdl	bdl	bdl	0.53	bdl	0.3	bdl	bdl	0.023	bdl	bdl	bdl	bdl	bdl	bdl	0.02	bdl	bdl	bdl	bdl	bdl	bdl	bdl
		Sh-3-2_1_3_4	83.2978		3.11	181.26	139.07	n.a.	636.87	2.14	234.31	9.61	138.15	1099.49	193.11	2341.67	bdl	122.7	bdl		bdl	2.71	bdl	bdl	bdl	bdl	bdl	bdl	bdl	bdl	bdl	0.19	0.074	bdl	0.029	0.25	bdl	bdl	bdl	bdl	bdl	bdl	bdl	bdl	bdl	bdl	bdl	bdl	0.027
		Sh-3-2_2_2_14	81.3341		6.06	103.19	92.01	n.a.	403.07	1.87	135.98	5.28	52.55	1356.38	170.27	1271.62	4.58	153.75	0.056		bdl	5.03	0.38	1.58	bdl	bdl	0.19	2.94	bdl	0.55	0.056	bdl	0.037	bdl	bdl	bdl	bdl	bdl	0.0166	0.45	0.019	0.0063	bdl	bdl	bdl	bdl	bdl	bdl	0.024
		Sh-3-2_3_3_25	83.4352		2.36	107.36	108.36	n.a.	279.86	1.84	150.18	5.2	132.07	1357.33	153.54	1671.98	4.07	138.92	bdl		0.34	3.19	bdl	bdl	bdl	bdl	bdl	bdl	bdl	1.31	bdl	0.47	bdl	bdl	bdl	bdl	bdl	bdl	bdl	bdl	bdl	bdl	bdl	0.031	0.035	bdl	bdl	bdl	bdl
		Sh-3-2_3_3_26	82.7654		1.88	94.76	95.84	n.a.	426.58	2.15	176.33	5.52	112.14	1292.39	149.68	1563.58	4.34	130.98	0.103		0.7	bdl	bdl	bdl	bdl	18.62	bdl	bdl	bdl	1.1	0.103	bdl	bdl	bdl	0.055	bdl	bdl	bdl	bdl	bdl	bdl	0.012	0.01	bdl	bdl	bdl	bdl	bdl	bdl
		Sh-3-2_4_3_29	82.1651		1.95	117.93	144.04	n.a.	493.86	2.38	143.98	6.41	96.86	1084.02	168.4	2059.56	5.62	113.32	bdl		bdl	3.36	0.9	bdl	bdl	bdl	bdl	bdl	0.068	bdl	bdl	0.28	0.14	0.21	0.037	bdl	bdl	bdl	bdl	0.078	0.011	0.011	bdl	bdl	bdl	bdl	bdl	bdl	bdl
		Sh-3-2_4_3_31	82.151		3.36	111.77	132.85	n.a.	513.22	2.09	118.08	5.44	63.14	1273.33	185.01	1820.32	6.84	126.47	bdl		1.06	2.28	bdl	bdl	bdl	bdl	0.09	bdl	bdl	0.61	bdl	bdl	0.158	0.118	0.0135	bdl	bdl	bdl	bdl	bdl	bdl	0.006	bdl	bdl	bdl	bdl	bdl	0.0108	0.022
	G4	Ter-3-2_1-2_Ol_1-8_1	77.7397		4.15139	21.6638	1.53986	89.7705	476.473	9.10996	61.1208	0.663297	0.708365	n.a.	105.48	34.5776	0.14166	264.488	0.32947		n.a.	n.a.	n.a.	n.a.	n.a.	n.a.	n.a.	n.a.	n.a.	n.a.	n.a.	n.a.	n.a.	n.a.	n.a.	n.a.	n.a.	n.a.	n.a.	n.a.	n.a.	n.a.	n.a.	n.a.	n.a.	n.a.	n.a.	n.a.	n.a.
		Ter-3-2_1-2_Ol_4-8_1-1	77.6927		4.83592	25.3894	bdl	114.501	494.5	13.3642	71.9996	0.773639	10.5613	n.a.	112.895	38.5069	0.133788	271.913	0.425664		n.a.	n.a.	n.a.	n.a.	n.a.	n.a.	n.a.	n.a.	n.a.	n.a.	n.a.	n.a.	n.a.	n.a.	n.a.	n.a.	n.a.	n.a.	n.a.	n.a.	n.a.	n.a.	n.a.	n.a.	n.a.	n.a.	n.a.	n.a.	n.a.
		Ter-3-2_1-2_Ol_4-8_2-1	77.6306		5.34851	27.5687	bdl	123.206	458.667	12.2056	73.6736	0.720373	10.5077	n.a.	117.64	38.5069	0.150044	284.26	0.371366		n.a.	n.a.	n.a.	n.a.	n.a.	n.a.	n.a.	n.a.	n.a.	n.a.	n.a.	n.a.	n.a.	n.a.	n.a.	n.a.	n.a.	n.a.	n.a.	n.a.	n.a.	n.a.	n.a.	n.a.	n.a.	n.a.	n.a.	n.a.	n.a.
		Ter-3-2_1-2_Ol_7-1_1	78.7802		5.93679	56.9352	bdl	58.2072	489.044	7.67062	206.037	5.20702	7.58762	n.a.	189.853	1275.44	1.91102	121.528	bdl		n.a.	n.a.	n.a.	n.a.	n.a.	n.a.	n.a.	n.a.	n.a.	n.a.	n.a.	n.a.	n.a.	n.a.	n.a.	n.a.	n.a.	n.a.	n.a.	n.a.	n.a.	n.a.	n.a.	n.a.	n.a.	n.a.	n.a.	n.a.	n.a.
		Ter-3-2_1-2_Ol_7-1_2-2	78.8447		5.42038	61.8733	bdl	58.3619	786.755	7.95271	214.507	6.78736	52.5042	n.a.	185.736	1546.56	3.24582	106.163	bdl		n.a.	n.a.	n.a.	n.a.	n.a.	n.a.	n.a.	n.a.	n.a.	n.a.	n.a.	n.a.	n.a.	n.a.	n.a.	n.a.	n.a.	n.a.	n.a.	n.a.	n.a.	n.a.	n.a.	n.a.	n.a.	n.a.	n.a.	n.a.	n.a.
		Ter-3-2_1-2_Ol_7-2_1-1	79.0814		2.54249	51.0537	bdl	64.7704	438.797	8.08772	200.112	5.15813	2.39772	n.a.	184.451	1394.11	1.71046	171.23	bdl		n.a.	n.a.	n.a.	n.a.	n.a.	n.a.	n.a.	n.a.	n.a.	n.a.	n.a.	n.a.	n.a.	n.a.	n.a.	n.a.	n.a.	n.a.	n.a.	n.a.	n.a.	n.a.	n.a.	n.a.	n.a.	n.a.	n.a.	n.a.	n.a.
		Ter-3-2_1-2_Ol_7-2_2-1	79.0895		2.56761	51.0203	bdl	56.0361	438.376	8.13574	190.897	5.1368	4.07056	n.a.	186.65	1409.82	1.87982	172.966	bdl		n.a.	n.a.	n.a.	n.a.	n.a.	n.a.	n.a.	n.a.	n.a.	n.a.	n.a.	n.a.	n.a.	n.a.	n.a.	n.a.	n.a.	n.a.	n.a.	n.a.	n.a.	n.a.	n.a.	n.a.	n.a.	n.a.	n.a.	n.a.	n.a.
		Ter-3-2_1-2_Ol_7-3_1	78.8588		2.46074	51.5594	bdl	62.4652	439.581	8.59408	234.419	5.2761	1.09543	n.a.	186.838	1234.58	1.85409	175.484	bdl		n.a.	n.a.	n.a.	n.a.	n.a.	n.a.	n.a.	n.a.	n.a.	n.a.	n.a.	n.a.	n.a.	n.a.	n.a.	n.a.	n.a.	n.a.	n.a.	n.a.	n.a.	n.a.	n.a.	n.a.	n.a.	n.a.	n.a.	n.a.	n.a.
		Ter-3-2_1-2_Ol_7-6_1	79.4218		2.45463	49.3383	bdl	63.1762	389.012	8.28701	189.804	5.12634	2.62766	n.a.	187.426	1403.54	1.74849	175.314	bdl		n.a.	n.a.	n.a.	n.a.	n.a.	n.a.	n.a.	n.a.	n.a.	n.a.	n.a.	n.a.	n.a.	n.a.	n.a.	n.a.	n.a.	n.a.	n.a.	n.a.	n.a.	n.a.	n.a.	n.a.	n.a.	n.a.	n.a.	n.a.	n.a.
		Ter-3-2_1-2_Ol_7-8_1-1	78.8877		2.77029	55.1119	bdl	90.6183	396.221	8.14934	197.486	5.17704	4.7087	n.a.	186.672	1363.46	1.74079	183.586	bdl		n.a.	n.a.	n.a.	n.a.	n.a.	n.a.	n.a.	n.a.	n.a.	n.a.	n.a.	n.a.	n.a.	n.a.	n.a.	n.a.	n.a.	n.a.	n.a.	n.a.	n.a.	n.a.	n.a.	n.a.	n.a.	n.a.	n.a.	n.a.	n.a.
		Ter-3-2_1-2_Ol_7-8_2-1	78.8626		2.60075	55.1159	bdl	92.6045	381.515	8.33763	185.25	5.06431	2.66699	n.a.	185.257	1340.67	1.91759	177.309	bdl		n.a.	n.a.	n.a.	n.a.	n.a.	n.a.	n.a.	n.a.	n.a.	n.a.	n.a.	n.a.	n.a.	n.a.	n.a.	n.a.	n.a.	n.a.	n.a.	n.a.	n.a.	n.a.	n.a.	n.a.	n.a.	n.a.	n.a.	n.a.	n.a.
		Sh-Ter-1-2_Ol_1-8-3	78.729		2.07	90.4	42	n.a.	388.07	2.14	203.02	4.45	32.51	1299.01	174.07	1358.75	3.62	161.49	0.042		bdl	2.84	bdl	bdl	bdl	bdl	0.112	bdl	bdl	bdl	0.042	0.13	bdl	0.101	0.025	bdl	bdl	bdl	bdl	bdl	bdl	bdl	bdl	bdl	bdl	bdl	bdl	bdl	bdl
		Sh-Ter-1-2_Ol_2-5-5	78.3544		3.83	93.39	38.19	n.a.	438.57	1.93	194.99	5.4	30.51	1401.06	168.58	1734.28	3.23	155.15	0.079		0.55	0.49	0.087	bdl	bdl	bdl	0.35	bdl	0.06	0.52	0.079	bdl	0.131	bdl	bdl	bdl	bdl	bdl	bdl	0.15	bdl	0.02	bdl	bdl	bdl	bdl	bdl	bdl	bdl
		Sh-Ter-1-2_Ol_3-3-10	78.6145		2.46	97.7	37.71	n.a.	410.75	2.09	214.07	5.2	42.86	1480.54	184.37	2060.34	bdl	174.58	bdl		bdl	3.77	0.39	bdl	bdl	bdl	bdl	bdl	bdl	bdl	bdl	0.17	0.096	0.33	0.017	bdl	bdl	bdl	0.0065	bdl	bdl	bdl	bdl	0.077	0.044	bdl	0.047	bdl	bdl
		Sh-Ter-1-2_Ol_3-3-11	78.4736		3.03	91.76	33.01	n.a.	478	2.35	164.38	4.95	38.74	1371.55	171.56	1911.69	6.62	157.3	bdl		bdl	4.06	bdl	bdl	bdl	bdl	bdl	bdl	bdl	0.28	bdl	bdl	bdl	bdl	bdl	bdl	0.34	bdl	bdl	bdl	bdl	bdl	bdl	bdl	bdl	bdl	bdl	bdl	bdl
		Sh-Ter-1-2_Ol_3-5-12	80.0096		3.24	103.07	51.48	n.a.	399.23	2.02	175.67	6.2	76.6	1264.63	167.92	1936.51	3.3	147.42	bdl		bdl	1.81	bdl	1.8	bdl	bdl	bdl	bdl	bdl	bdl	bdl	bdl	0.112	bdl	bdl	0.24	bdl	bdl	bdl	bdl	bdl	0.0056	0.0048	bdl	0.033	0.0086	0.036	0.0051	bdl
		Sh-Ter-1-2_Ol_3-13-14	79.1402		3.52	90.88	43.78	n.a.	389.87	2.02	165.55	5.95	42.76	1435.64	175.93	1710.01	5.28	165.98	0.094		bdl	2.05	bdl	bdl	bdl	bdl	0.17	bdl	bdl	0.52	0.094	bdl	bdl	bdl	0.022	bdl	bdl	bdl	0.038	bdl	0.0062	0.0063	bdl	bdl	bdl	bdl	0.039	bdl	bdl
		Sh-Ter-1-2_Ol_3-13-15	79.1402		3.05	94.47	44.65	n.a.	431.61	1.6	170.6	5.81	50.84	1463.85	181.84	1815.45	4.24	161.21	bdl		bdl	1.15	bdl	bdl	bdl	bdl	bdl	0.221	0.04	bdl	bdl	bdl	0.138	0.18	0.032	bdl	bdl	bdl	0.006	0.051	bdl	0.0069	bdl	bdl	0.041	bdl	bdl	bdl	bdl
		Sh-Ter-1-2_Ol_4-1-16	80.9223		2.91	91.23	56.12	n.a.	296.53	2.28	154.12	5.76	29.87	1285.39	176.02	1928.09	bdl	160.34	bdl		0.84	4	bdl	bdl	bdl	bdl	bdl	bdl	0.103	0.38	bdl	bdl	0.048	bdl	0.05	bdl	bdl	bdl	bdl	bdl	0.0071	0.0072	0.0062	bdl	0.042	bdl	bdl	bdl	bdl
		Sh-Ter-1-2_Ol_5-1-20	78.8339		3.51	103.73	43.61	n.a.	376.82	2.41	203.32	5.37	40.74	1396.48	169.73	1360.98	bdl	160.94	bdl		0.83	bdl	bdl	bdl	bdl	bdl	bdl	bdl	bdl	0.78	bdl	bdl	bdl	bdl	bdl	bdl	0.117	bdl	bdl	0.051	bdl	0.007	0.006	bdl	bdl	bdl	bdl	bdl	0.026
		Sh-Ter-1-2_Ol_5-9-24	80.8502		3.39	52.84	19.93	n.a.	257.61	1.55	71.42	2.21	26.76	1363.86	165.57	2157.28	3.87	148.5	0.121		bdl	4.04	bdl	bdl	bdl	bdl	bdl	bdl	bdl	bdl	0.121	bdl	bdl	bdl	bdl	bdl	bdl	bdl	bdl	0.096	bdl	bdl	0.028	bdl	bdl	0.05	bdl	bdl	0.05
		Sh-Ter-1-2_Ol_8-4-27	75.5803		4.4	45.2	3.39	n.a.	346.71	2.96	40.14	1	12.49	1363.07	121.62	298.93	3.92	254.67	bdl		0.39	3.55	bdl	bdl	bdl	bdl	bdl	bdl	bdl	0.49	bdl	0.56	0.086	0.126	0.056	bdl	0.106	bdl	bdl	bdl	bdl	bdl	0.037	0.032	bdl	bdl	bdl	bdl	0.046
		Sh-Ter-1-2_Ol_8-10-28	78.919		2.8	88.76	53.81	n.a.	451.86	2.31	161.62	5.65	48.15	1414.7	174.68	1751.17	7.72	167.62	bdl		0.39	bdl	bdl	bdl	bdl	bdl	bdl	bdl	0.087	0.46	bdl	bdl	0.129	0.085	bdl	bdl	bdl	bdl	bdl	0.045	0.0061	bdl	bdl	0.032	bdl	bdl	0.077	bdl	0.07
Groundmass olivine		Sh-3-2_1_5_7	86.6129			297.24	263.28	n.a.		3.39	234.69	13.9	371.1	524.6	184.38	2906.98	7.04	64.04	0.053		0.18	28.52	0.43	bdl	bdl	bdl	10.12	123.49	0.394	bdl	0.053	bdl	bdl	bdl	0.024	0.157	bdl	bdl	0.579	111.61	0.219	0.524	0.072	0.349	0.067	0.0114	0.015	0.0071	0.044
		Sh-3-2_1_3_3	85.8485		4.69	199.57	262.73	n.a.	752.28	2.32	187.89	9.11	334.81	952.64	171.11	2541.28	7.44	100.02	bdl		bdl	4.18	0.36	bdl	bdl	bdl	0.213	0.74	0.081	bdl	bdl	bdl	bdl	bdl	bdl	bdl	bdl	bdl	0.006	2.57	0.055	0.027	0.0114	0.035	0.041	bdl	bdl	bdl	bdl
		Sh-3-2_2_2_15	85.7248			561.96	170.5	n.a.		2.1	197.79	6.73	246.32	1314.35	154.76	2611.52	bdl	115.73	0.026		bdl	29.26	0.38	bdl	1.71	bdl	4.55	60.07	0.14	0.25	0.026	bdl	bdl	bdl	bdl	bdl	bdl	bdl	0.379	151.33	0.069	0.046	0.0049	bdl	0.034	bdl	bdl	bdl	bdl
		Sh-3-2_4_3_27	85.7544		2.32	152.82	183.71	n.a.	671.29	2.66	180.76	8.1	226.47	974.04	163.19	2801.53	8.53	107.87	bdl		bdl	bdl	0.44	bdl	bdl	bdl	bdl	bdl	bdl	0.233	bdl	0.29	bdl	bdl	bdl	bdl	0.061	bdl	0.0195	0.081	bdl	0.0056	bdl	bdl	bdl	0.0085	bdl	bdl	bdl
		Sh-3-2_4_3_28	85.6598		2.59	154.5	213.01	n.a.	580.25	2.65	207.51	8.24	224.73	1044.1	173.69	2920.12	7.62	106.04	bdl		bdl	3.23	bdl	1.46	bdl	bdl	0.105	bdl	bdl	bdl	bdl	bdl	bdl	bdl	bdl	bdl	bdl	bdl	bdl	bdl	bdl	bdl	bdl	0.024	bdl	0.0071	bdl	bdl	bdl
[truncated: 13 more columns]

## Sheet: Table S3
Composition of secondary inclusions from olivine macrocrysts obtained using ICP-LA.
	Na23	Al27	K	44Ca	Ti47	V51	Sr88	Y89	Nb93	Ba137	La139	Ce140	Pr141	Nd146	Sm147	151Eu	153Eu	Gd158	Tb159	Dy163	Ho165	Er167	Tm169	Yb173	Lu175	REEtot	177Hf	178Hf	Ta181	W184	Th232	U238
Ter 3_2-2	881350	593625	179.79	2989.21	0.395183	1.33876	27.225	0.431857	0.876218	0.681743	3.19592	10.0799	2.80239	0.295078	0.0404089	0.131497	0.140815	0.0373171	0.105374	0.0273421	0.1108	0.0116342	0.0296791	0.00225726	0.00951681	16.8791	0.0705181	0.104526	0.38412	0.00103635	0.762227	0.273303
Ter 3_2-3	3.51622e+06	1.35435e+06	728.13	27641.5	1.15698	1.38277	210.515	1.94248	2.3493	3.4904	8.08468	17.3028	2.50859	0.412513	0.0643798	0.498252	0.32139	0.0458387	0.543179	0.163325	0.632218	0.170185	0.12701	0.0507138	0.111998	30.7157	0.204595	0.498894	0.277713	0.0304114	0.405721	0.423974
Ter 3_2-8	46284.7	7366.01	5.81292	122.688	0.0179419	0.0777812	2.10579	0.0198183	0.0731911	0.114774	0.351604	0.984212	0.204601	0.019153	0.00287317	0.00883843	0.0122673	0.00182417	0.0112385	0.000976719	0.00135406	0.00347434	0.0014508	0.000662048	0	1.59226	0.00362421	0.00542274	0.0412536	0.00312644	0.0918787	0.057807
Ter 3_2-9	412295	18801.4	122.269	1323.66	0.0422837	0.398186	15.8234	0.151551	0.807095	1.02912	3.24602	8.77744	2.73502	0.183046	0.0153859	0.0551494	0.0726734	0.0127176	0.0951809	0.0196862	0.0438767	0.00731049	0.00427377	0.000975128	0.00411124	15.2002	0.0350693	0.0529734	0.258246	0.00936335	1.21037	0.433598
Ter 3_2-11	2.52091e+06	736655	624.702	6248.3	2.28185	4.6858	64.8781	1.04777	2.40534	1.61705	6.66648	21.9034	4.97349	0.661164	0.08131	0.299475	0.413185	0.0501392	0.298734	0.0740385	0.209127	0.134435	0.0633339	0.00777269	0.0203084	35.4432	0.102949	0.157334	1.54145	0.0182666	0.698902	0.729019
Ter 3_2-13	728273	382720	200.164	2896.45	0.48468	1.14444	22.8996	0.474601	1.00808	0.856071	4.10176	12.2619	2.5016	0.331743	0.0312328	0.141378	0.212786	0.0258734	0.130862	0.0520046	0.138072	0.0228319	0.0389308	-0.000380686	0.0224702	19.8003	0.0354771	0.0864119	0.466107	0.00705781	0.901695	0.350303
